# Supplementary material for: Identification of new susceptibility loci for IgA nephropathy in Han Chinese
Source: PubMed Central journal article supplement (PMC4458882; doi:10.1038/ncomms8270), 2015-06-01
Supplement: ncomms8270-s1.pdf [file ncomms8270-s1.pdf]

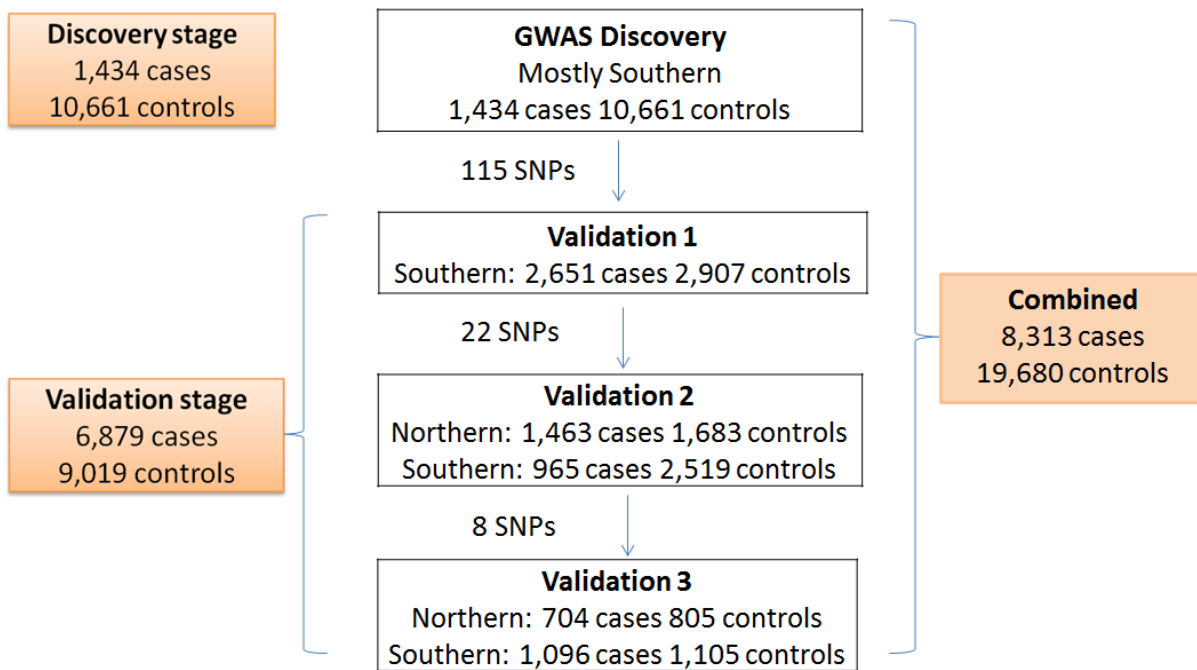

**Supplementary figure 1.** Flowchart showing study design and number of SNPs and samples analysed across four stages.

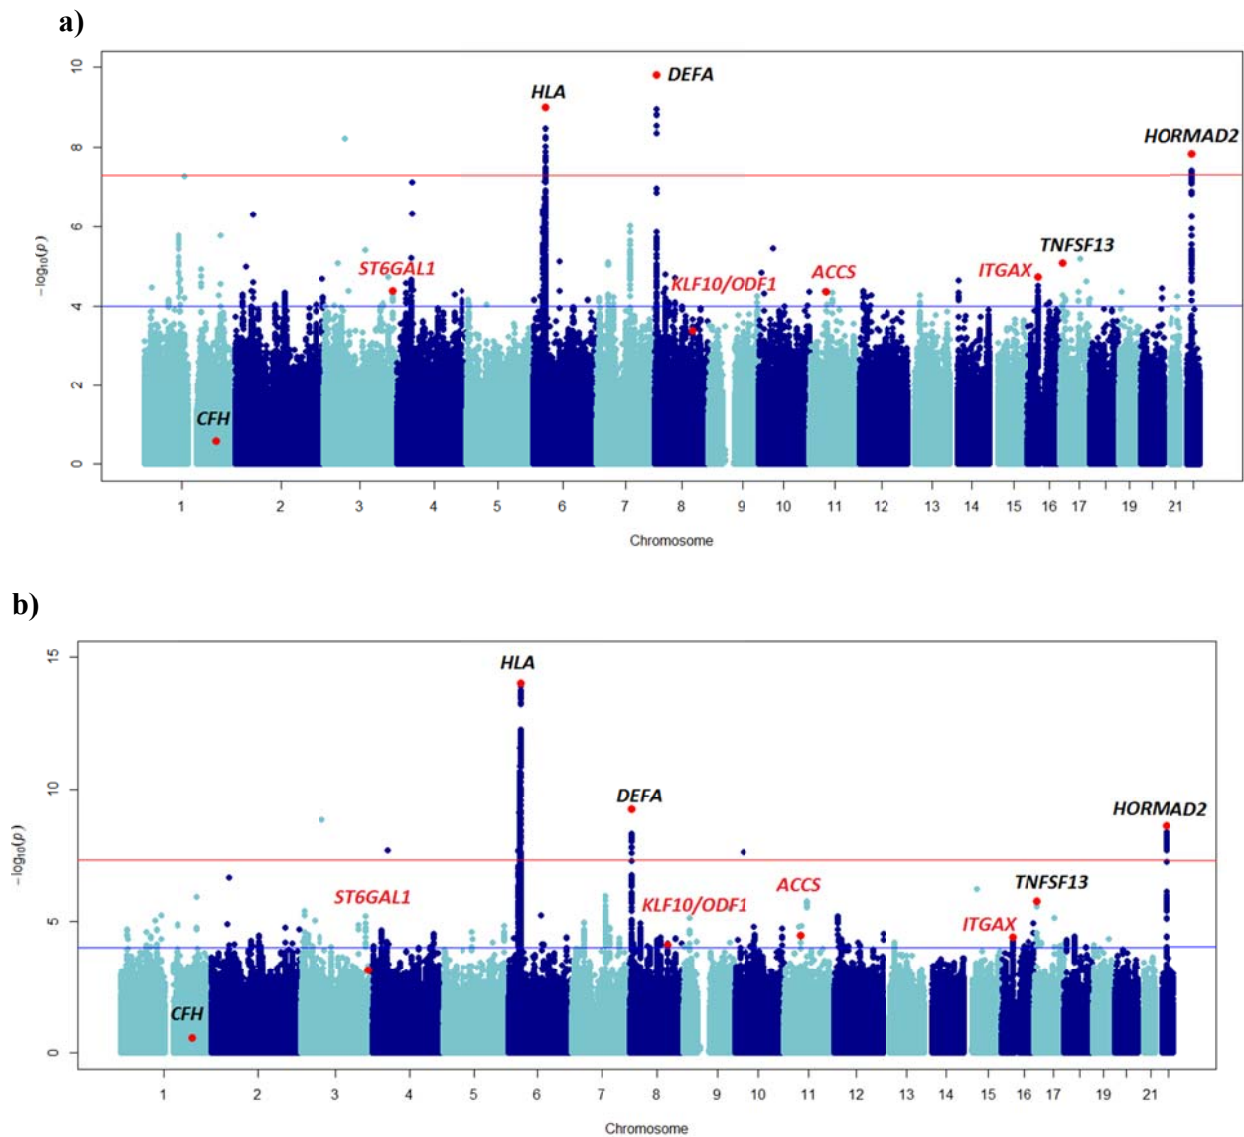

**Supplementary figure 2. Manhattan plots** from the genome-wide discovery stage generated using P-values of SNPs passing quality control filters from the following statistical tests: a) GEMMA<sup>1</sup> wald test on threshold-filtered genotypes (3.7 million SNPs) and b) Principal components (PC)-adjusted logistic regression test on genotype dosages (3.8 million SNPs). Reported SNPs within previously identified and novel loci are indicated in red.

a)  $\lambda_{GC} = 1.039$ ,  $\lambda_{GC}$  without MHC SNPs = 1.035

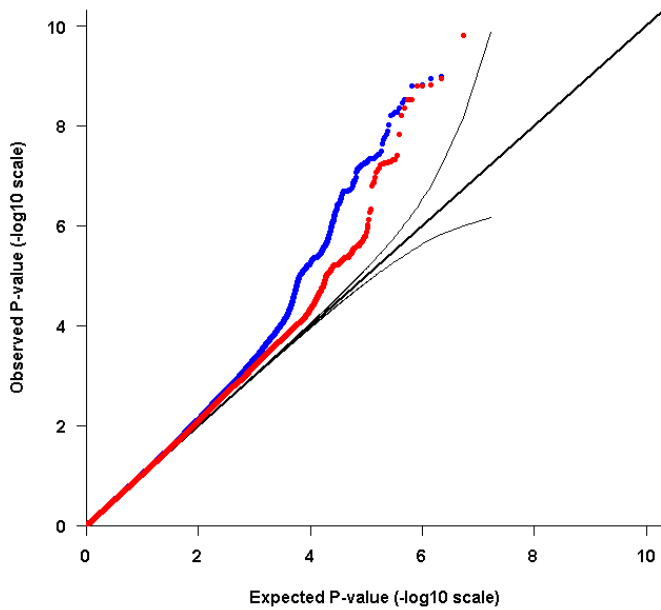

b)  $\lambda_{GC} = 1.087$ ,  $\lambda_{GC}$  without MHC SNPs = 1.077

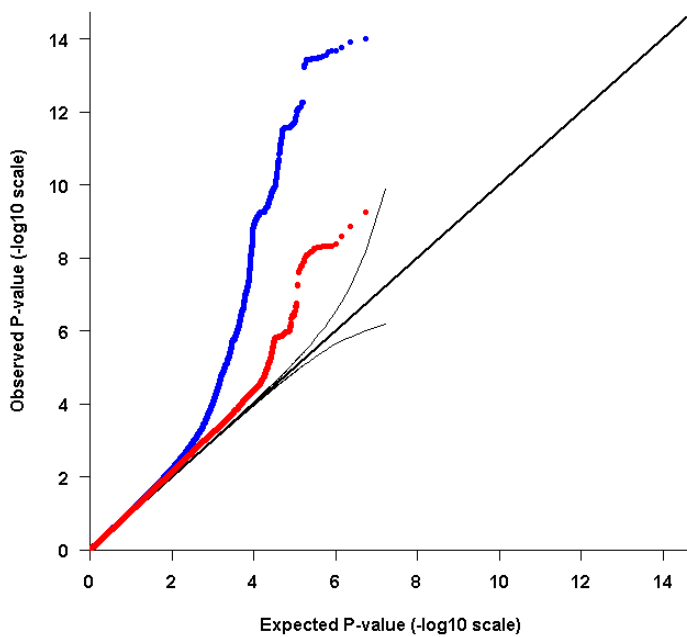

**Supplementary figure 3. Quantile-quantile plots** before (blue) and after (red) removing MHC SNPs from the genome-wide discovery stage showing observed vs expected P-values of SNPs passing quality control filters from the following statistical tests a) GEMMA<sup>1</sup> wald test on threshold-filtered genotypes and b) PC-adjusted logistic regression test on genotype dosages. The 95% confidence intervals of the P-value distributions and the genomic inflation lambda GC values are indicated.

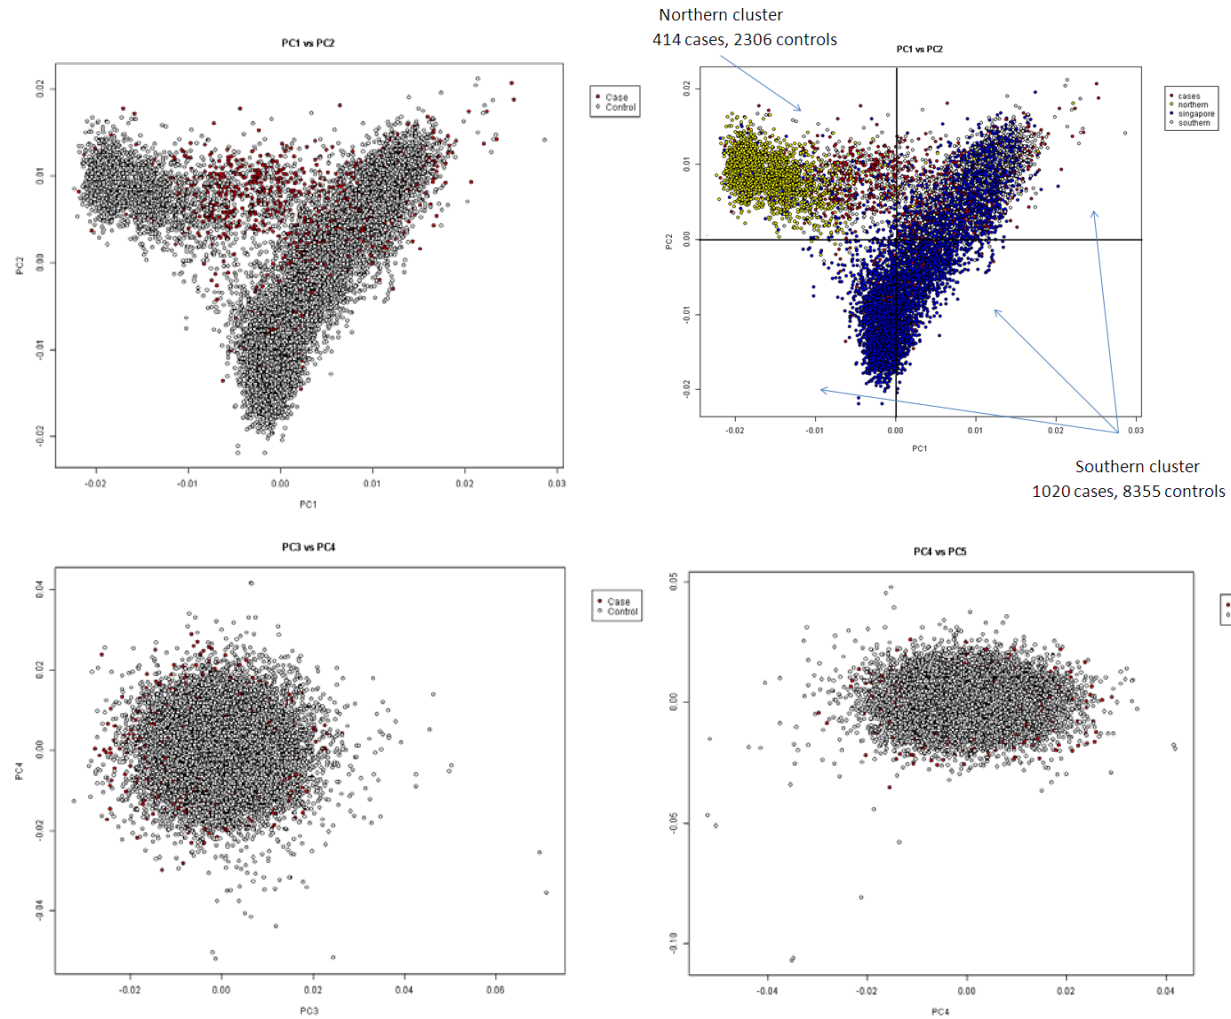

**Supplementary figure 4. Principal components analysis on all samples**

Plots of the first five principal components (PCs; PC1 vs PC2, PC3 vs PC4 and PC4 vs PC5), which were derived from the PCA analysis of 12,095 samples of the discovery analysis, of which 1,434 cases and 4,270 controls have been analysed in the previous GWAS<sup>2</sup>

### Northern cluster PC1 vs 2

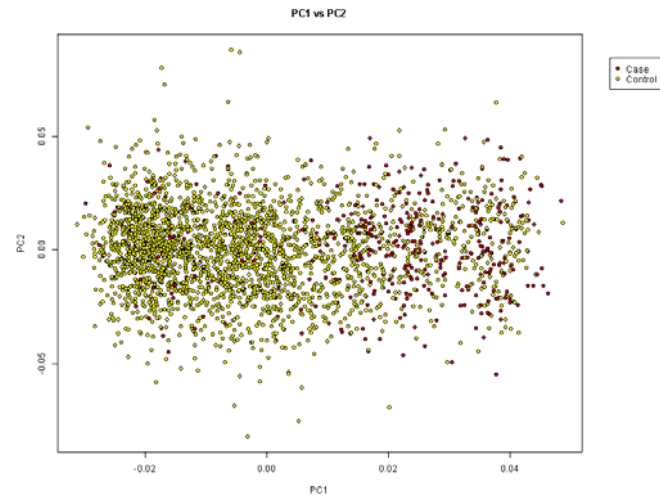

### Southern Cluster PC1vs 2

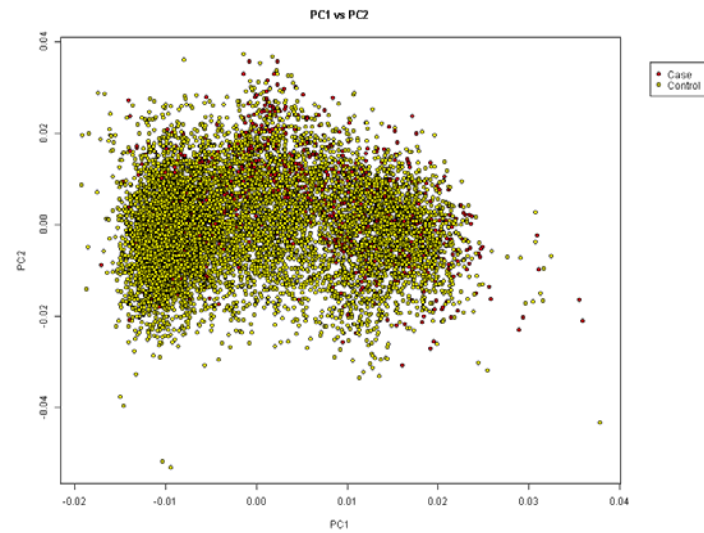

### Supplementary figure 5. Principal components analysis on Northern and Southern clusters

Plots of the first two principal components (PCs; PC1 vs PC2) calculated separately for the Northern (2,581 cases, 4,794 controls) and Southern (5,732 cases, 14,886 controls) samples.

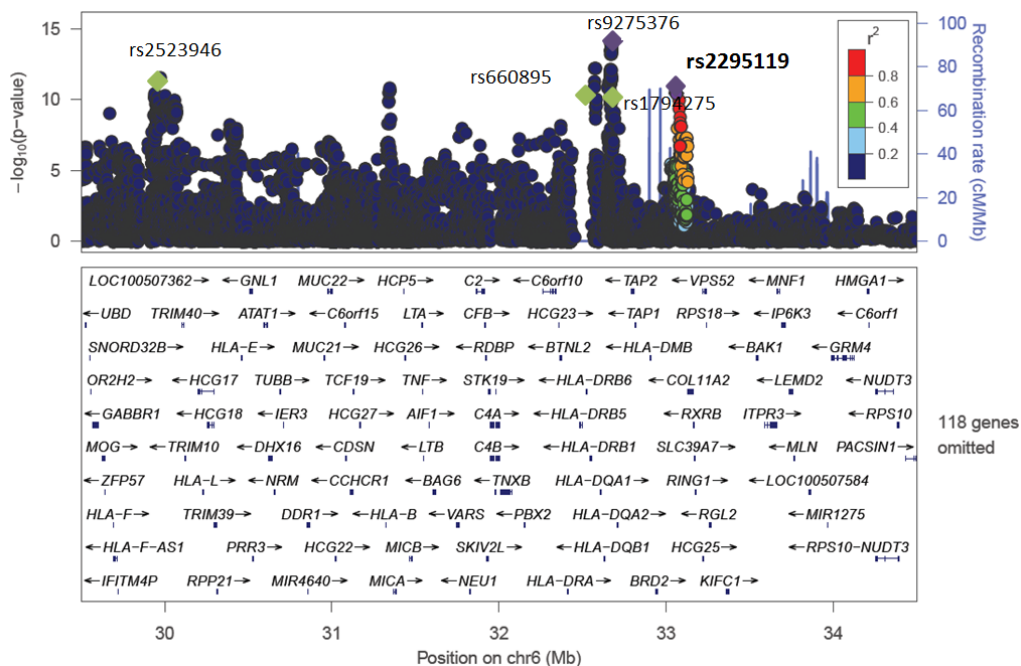

**Supplementary figure 6.** Regional association plot of the HLA region showing the novel independent signal (purple) and the previously reported SNPs<sup>2</sup> (green). The SNP rs9275376 is in LD with rs660895 ( $r^2=0.477$ ,  $D'=0.755$ ) and rs1794275 ( $r^2=0.293$ ,  $D'=0.572$ ) and was not imputed in our previous analysis because it was absent from the older reference panels (HapMap II+III). P-values shown are based on logistic regression analyses adjusted for the first five principal components.

### HORMAD2

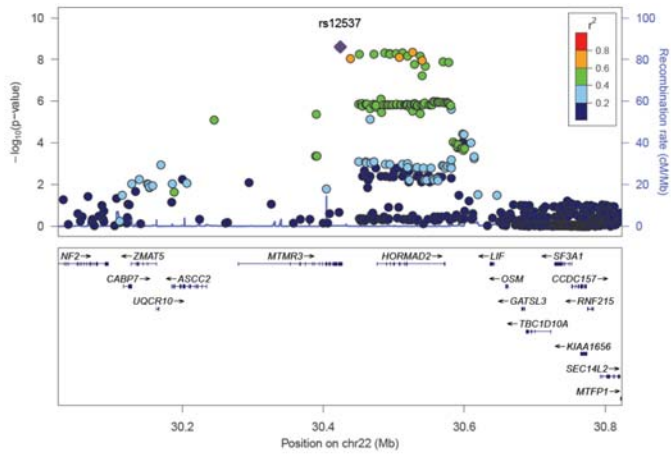

### CFH

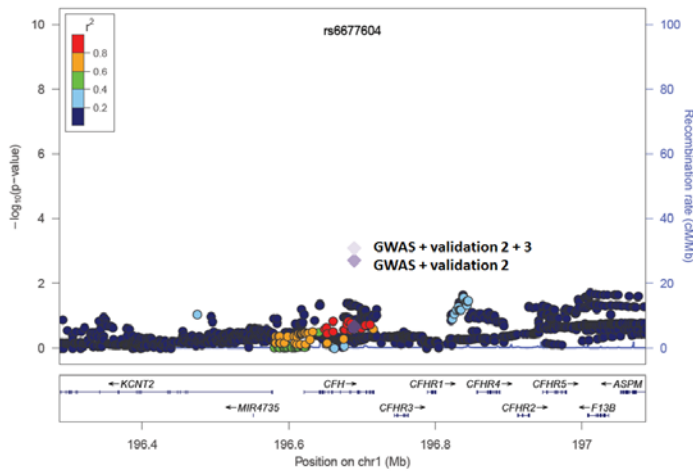

### TNFSF13

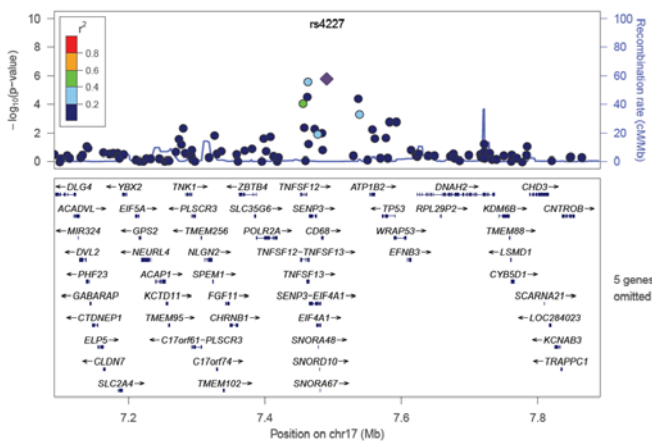

Supplementary figure 7. Regional association plots of previously reported loci<sup>2,4</sup>

### CARD9

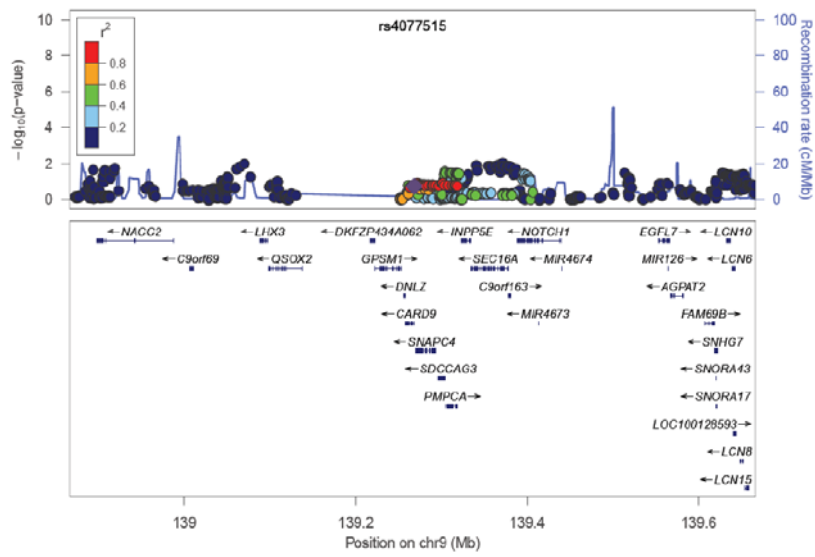

### VAV3

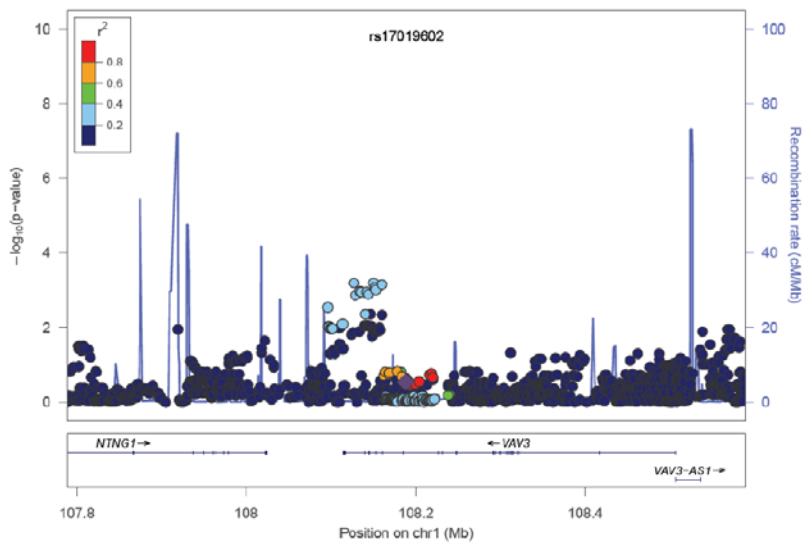

Supplementary figure 8. Regional association plots of recently reported loci<sup>5</sup>



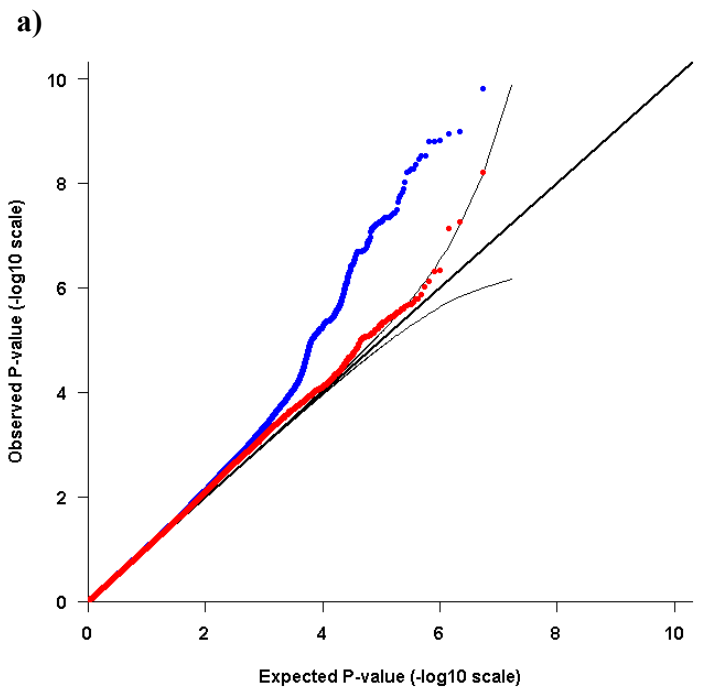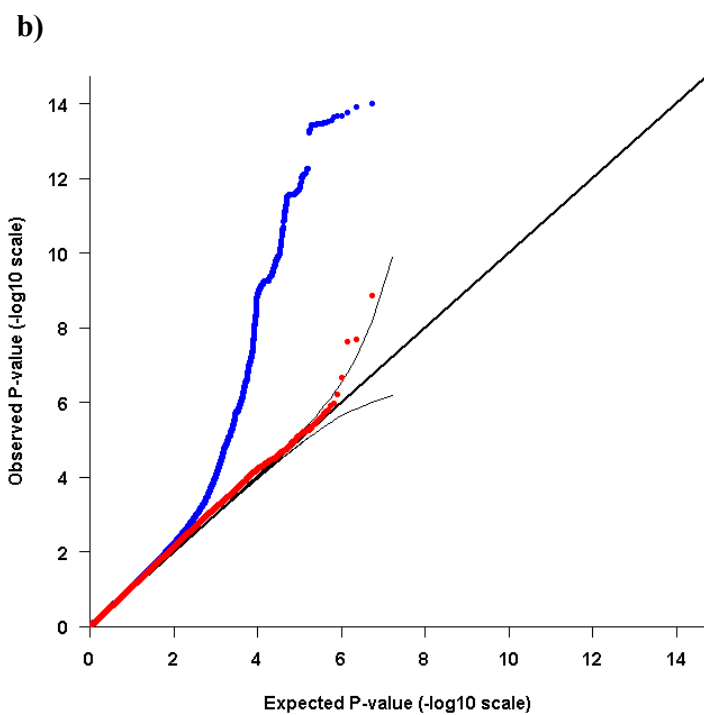

**Supplementary figure 9. Quantile-quantile plots** before (blue) and after (red) removing five known IgAN loci from the genome-wide discovery stage showing observed vs expected P-values of SNPs passing quality control filters from the following statistical tests: a) GEMMA<sup>1</sup> wald test on threshold-filtered genotypes and b) PC-adjusted logistic regression test on genotype dosages. The 95% confidence intervals of the P-value distributions are indicated.

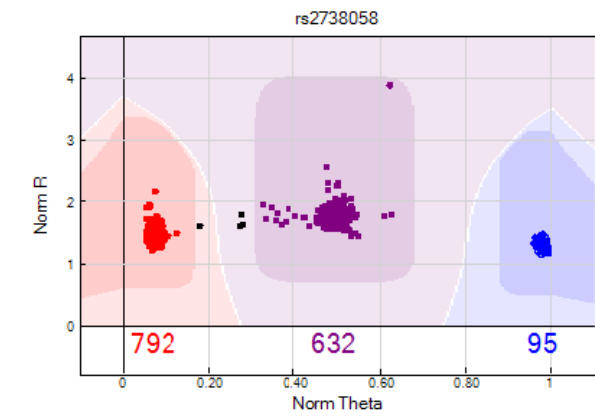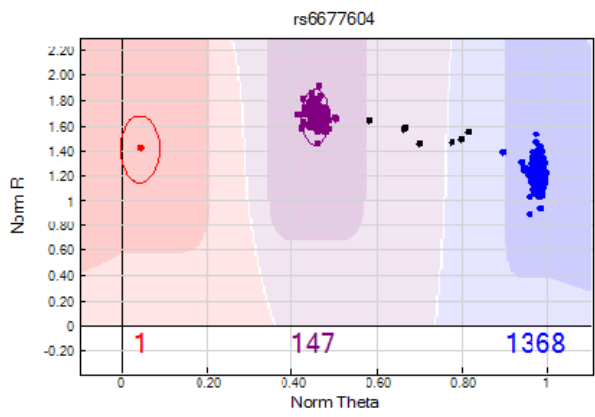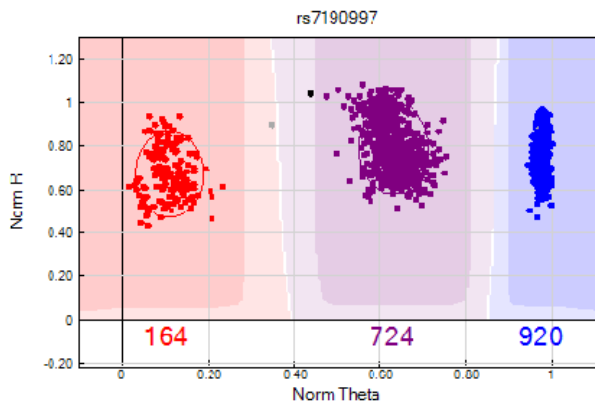

**Supplementary figure 10.** Examples of genotyping cluster plots of the top reported SNPs on Illumina

rs12716641

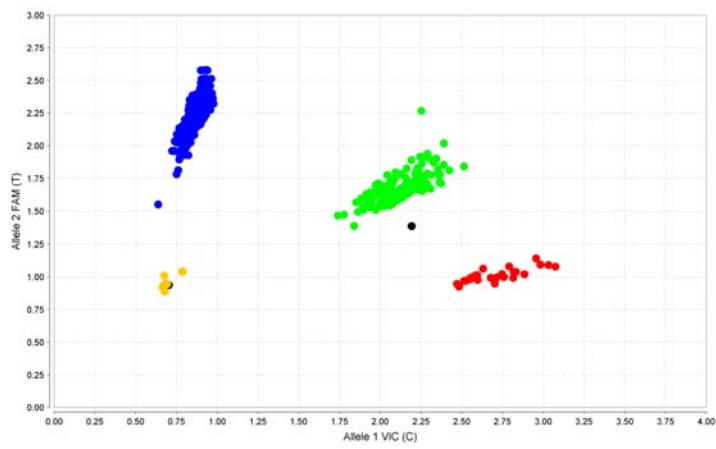

**Supplementary figure 11.** Example of genotyping cluster plot of rs12716641 on Taqman.

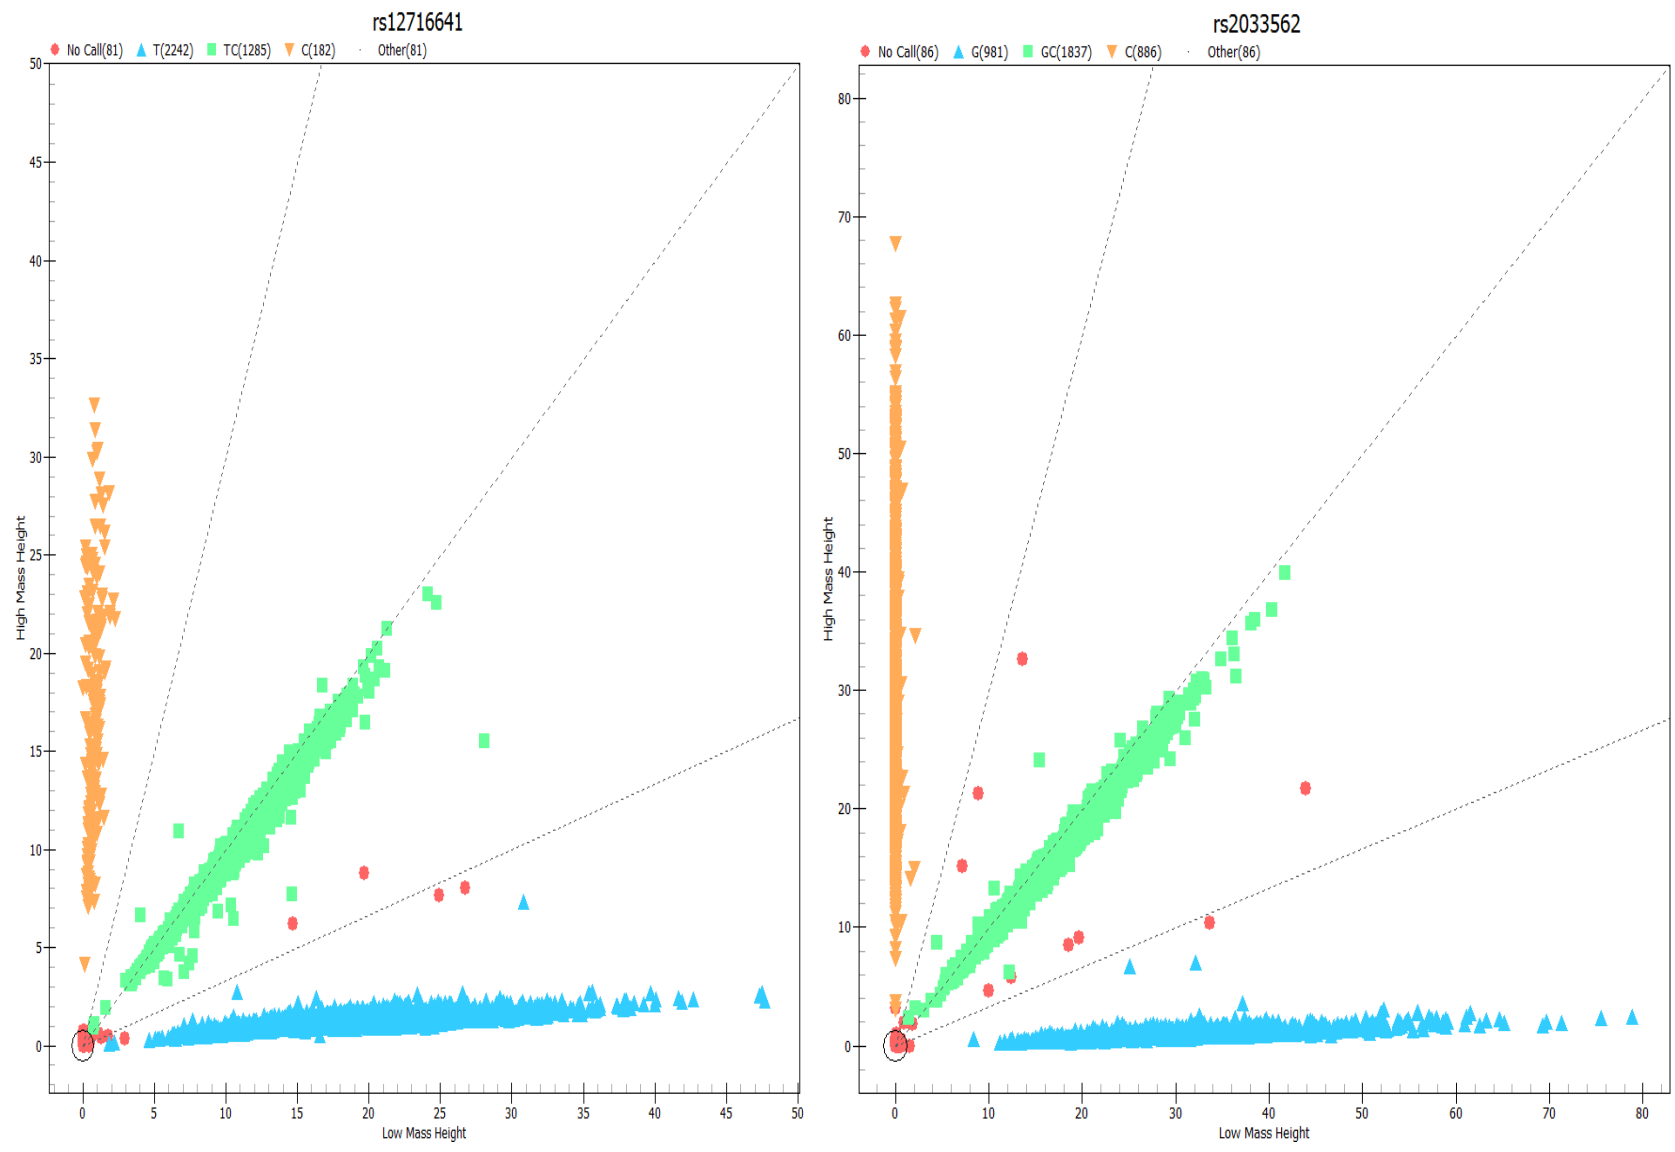

**Supplementary figure 12 a).** Examples of genotyping cluster plots of the top reported SNPs on Sequenom.

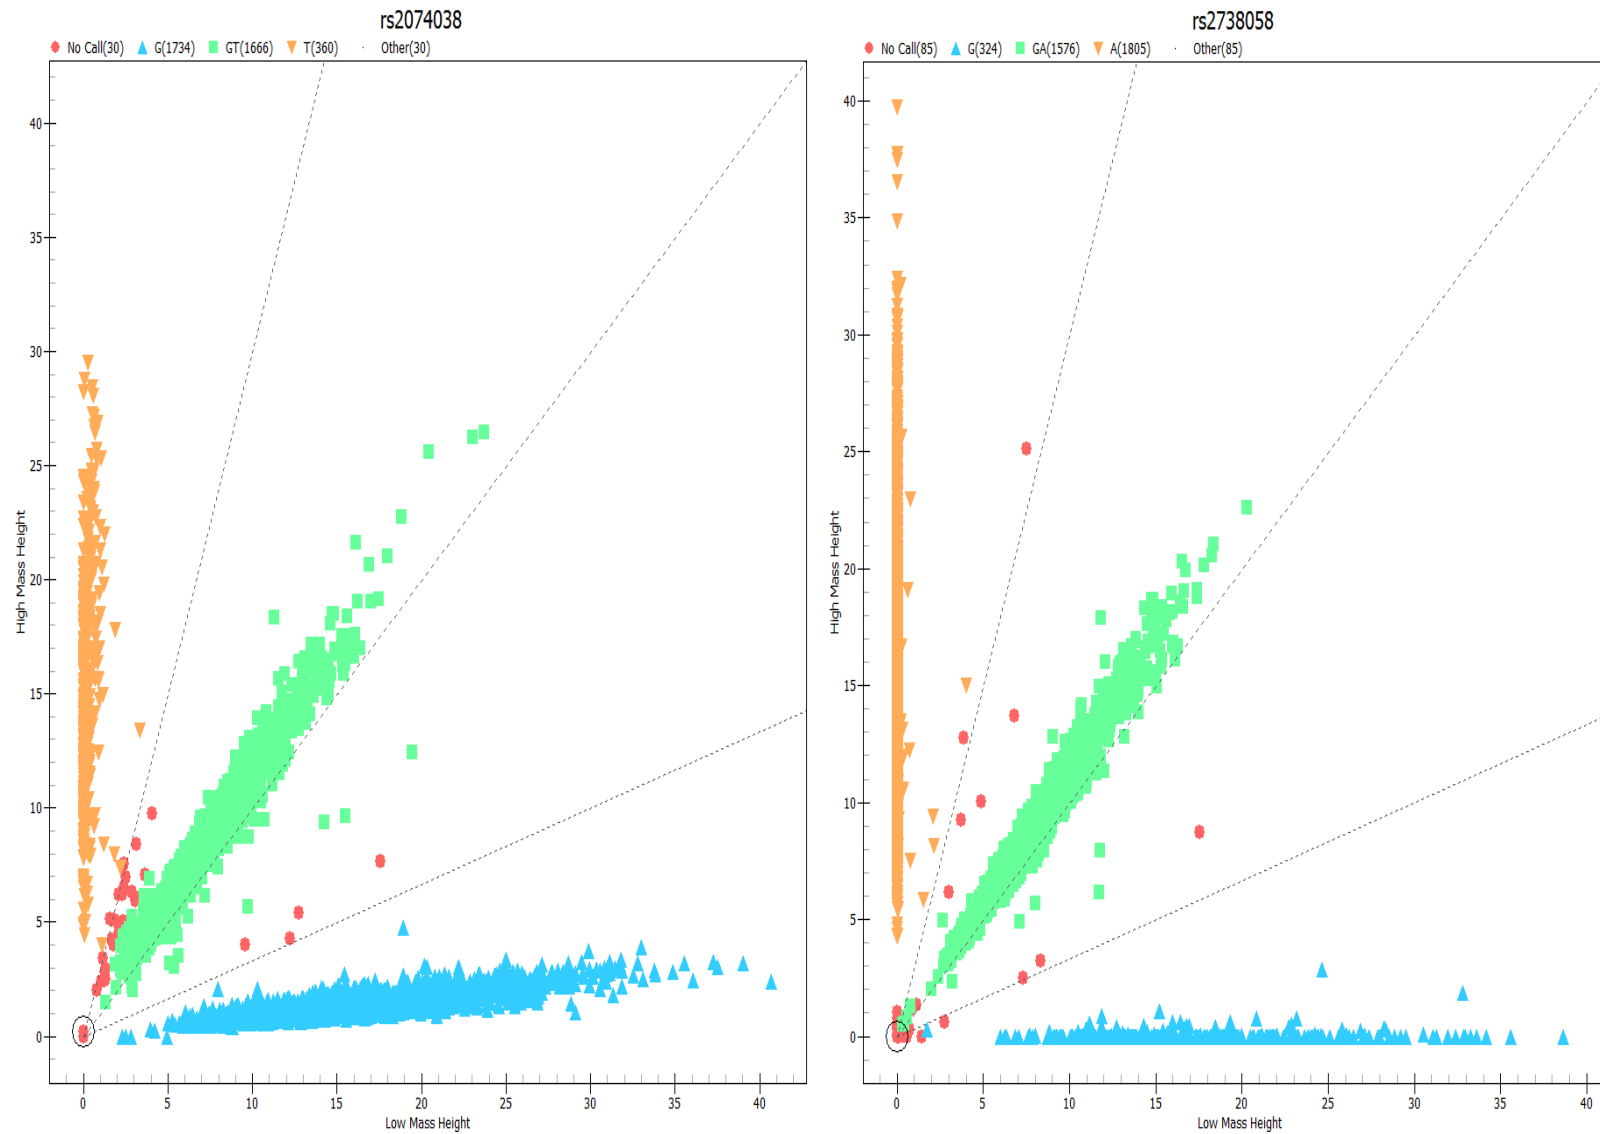

**Supplementary figure 12 b).** Examples of genotyping cluster plots of the top reported SNPs on Sequenom.

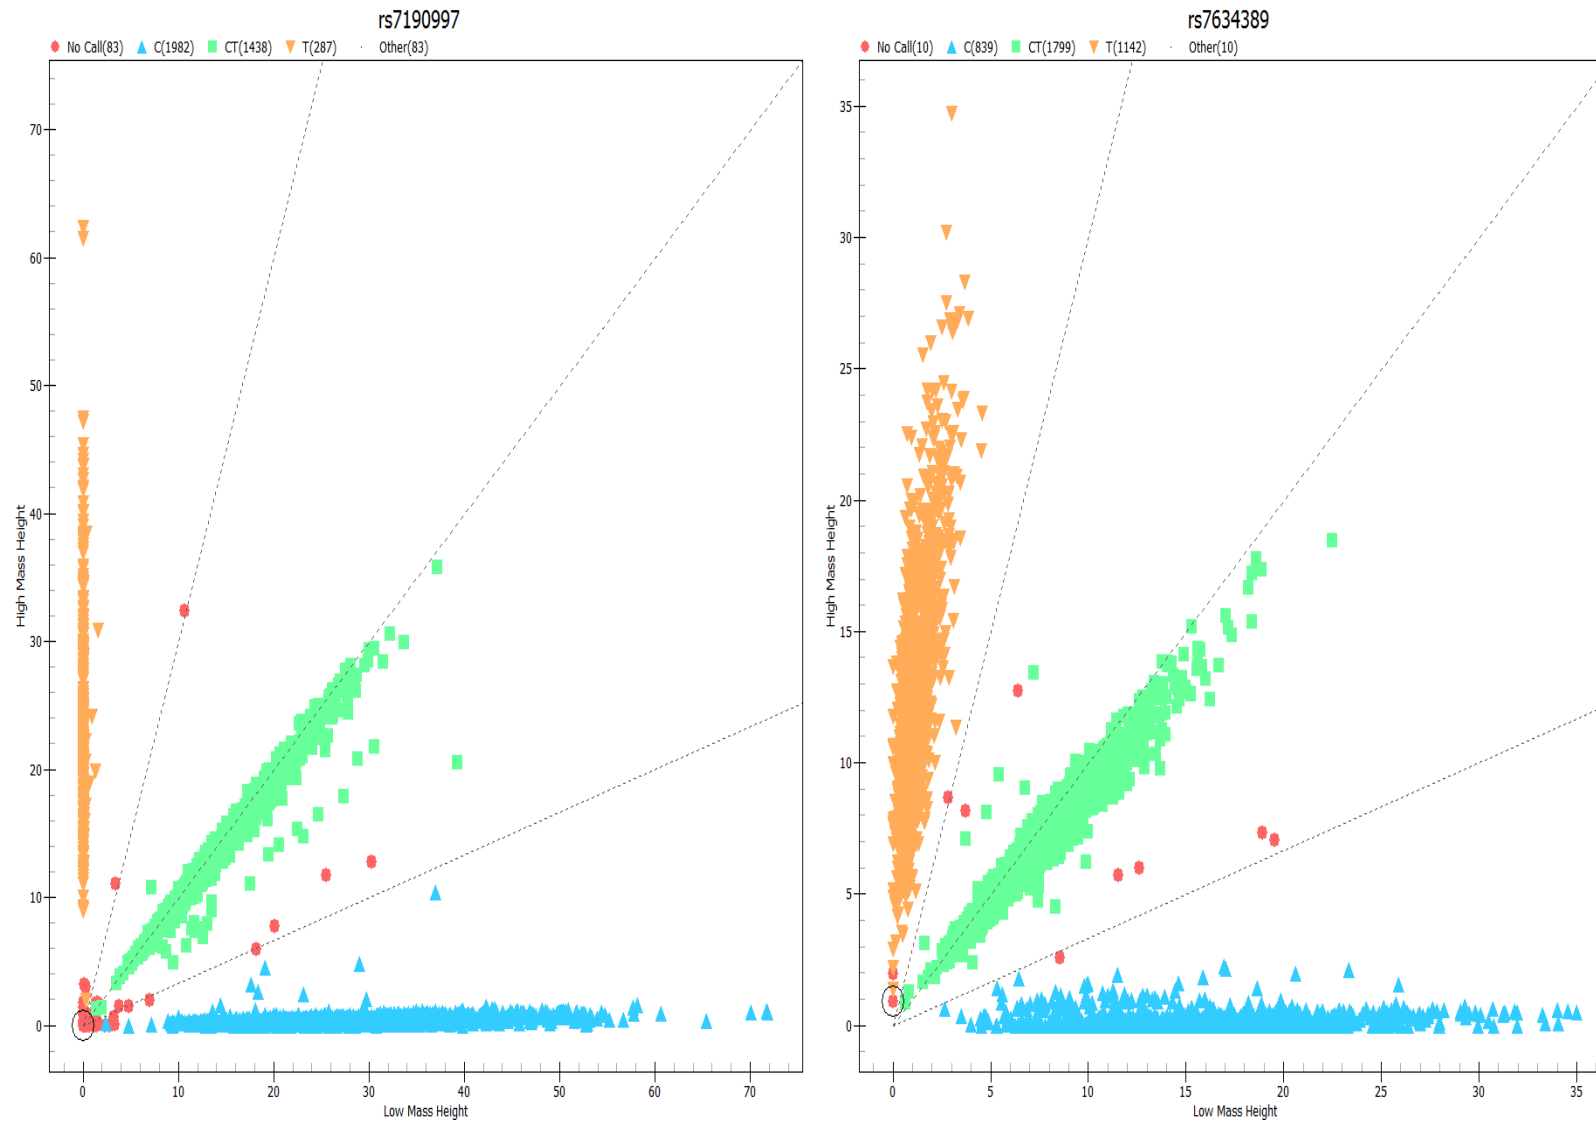

**Supplementary figure 12 c).** Examples of genotyping cluster plots of the top reported SNPs on Sequenom.

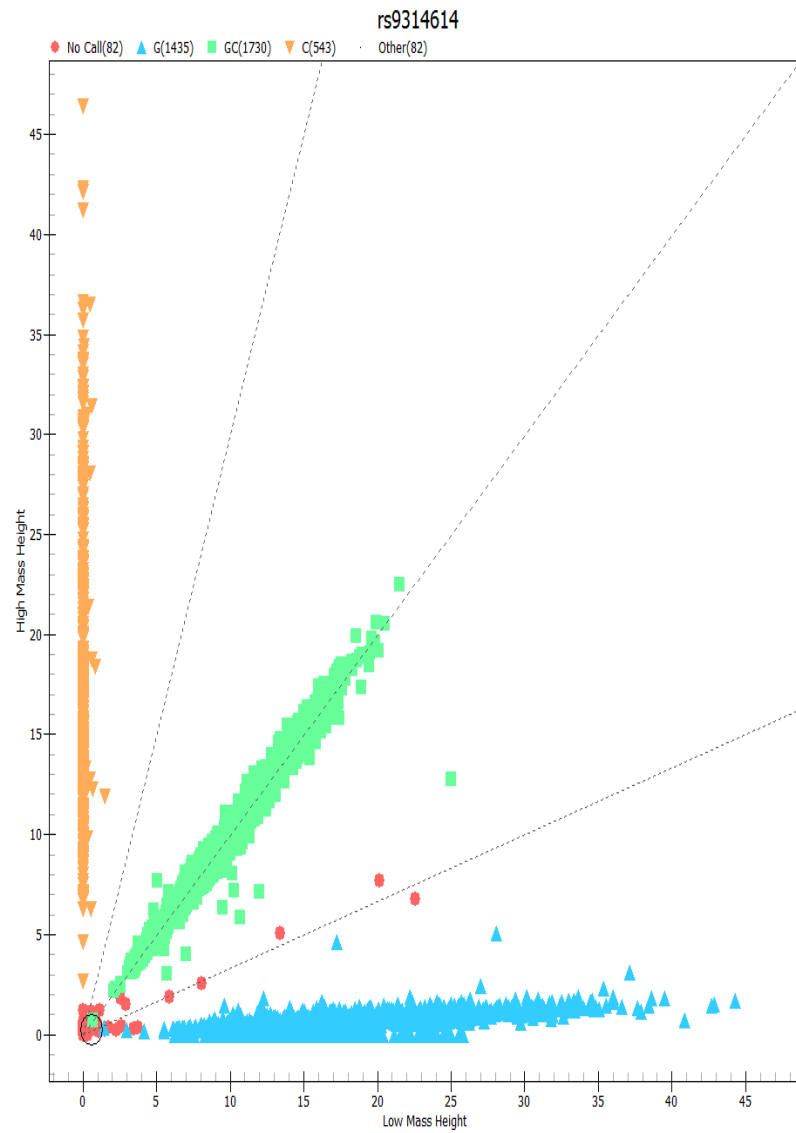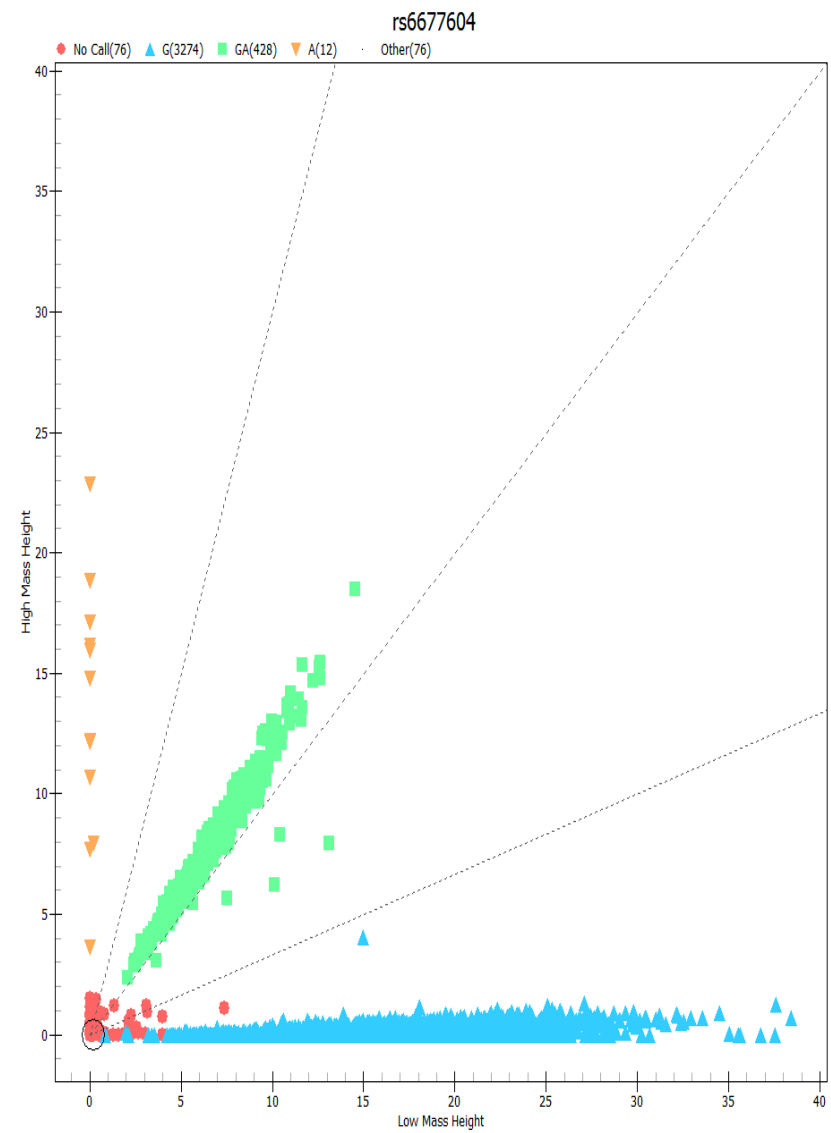

Supplementary figure 12 d). Examples of genotyping cluster plots of the top reported SNPs on Sequenom.

| Cohort       | Population | IgAN Cases  |                  |                 | Controls    |                  |                 |
|--------------|------------|-------------|------------------|-----------------|-------------|------------------|-----------------|
|              |            | Sample size | Mean age (years) | Male/Female (%) | Sample size | Mean age (years) | Male/Female (%) |
| GWAS         |            | 1434#       | 35               | 44.0/56.0       | 4270#       | 43.8             | 47.5/52.5       |
|              |            |             |                  |                 | +           |                  |                 |
|              |            |             |                  |                 | 6391        | 44.0             | 57.8/42.2       |
| Validation 1 | Southern   | 2651        | 35.3±10.9        | 45.3/54.7       | 2907        | 38.8±13.1        | 65.4/34.6       |
| Validation 2 | Southern   | 965         | 35.6±12.0        | 52.1/47.9       | 2519        | 35.2±11.7        | 61.1/38.9       |
|              | Northern   | 1463        | 33.4±11.7        | 52.9/47.1       | 1683        | 28.9±7.6         | 52.4/47.6       |
| Validation 3 | Southern   | 1096        | 35.4±11.6        | 47.8/52.2       | 1105        | 35.9±11.2        | 48.8/51.2       |
|              | Northern   | 704         | 35.6±12.5        | 48.9/51.1       | 805         | 39.0±12.1        | 54.9/45.1       |

**Supplementary table 1.** Sample information. More description is available in Supplementary note.

# Samples analysed in the previous GWAS<sup>2</sup>



**Current GWAS discovery**, 1,434 cases, 10,661 controls

$\alpha = 0.0001$ , unselected controls

| Minor allele frequency | OR   |       |       |       |       |        |        |        |       |
|------------------------|------|-------|-------|-------|-------|--------|--------|--------|-------|
|                        | 1.1  | 1.15  | 1.2   | 1.25  | 1.3   | 1.35   | 1.4    | 1.45   | 1.5   |
| 0.05                   | 0.3% | 1.2%  | 4.1%  | 11.1% | 24.2% | 42.5%  | 62.5%  | 79.5%  | 90.7% |
| 0.1                    | 0.8% | 4.7%  | 16.9% | 40.0% | 67.1% | 87.1%  | 96.5%  | 99.3%  | 99.9% |
| 0.2                    | 2.7% | 16.4% | 48.1% | 80.5% | 96.0% | 99.6%  | 100.0% | 100.0% | 100%  |
| 0.3                    | 4.9% | 27.6% | 66.9% | 92.5% | 99.2% | 100.0% | 100%   | 100%   | 100%  |
| 0.4                    | 6.4% | 34.1% | 74.6% | 95.5% | 99.6% | 100.0% | 100%   | 100%   | 100%  |
| 0.5                    | 6.7% | 35.1% | 75.2% | 95.5% | 99.6% | 100.0% | 100%   | 100%   | 100%  |

**Previous GWAS discovery**, 1,434 cases, 4,270 controls<sup>2</sup>

$\alpha = 0.0001$ , unselected controls

| Minor allele frequency | OR   |       |       |       |       |       |       |        |       |
|------------------------|------|-------|-------|-------|-------|-------|-------|--------|-------|
|                        | 1.1  | 1.15  | 1.2   | 1.25  | 1.3   | 1.35  | 1.4   | 1.45   | 1.5   |
| 0.05                   | 0.2% | 0.8%  | 2.7%  | 7.2%  | 15.9% | 29.3% | 46.2% | 63.6%  | 78.4% |
| 0.1                    | 0.6% | 3.1%  | 11.2% | 28.1% | 51.8% | 74.5% | 89.7% | 96.8%  | 99.3% |
| 0.2                    | 1.8% | 11.1% | 35.3% | 67.2% | 89.4% | 97.9% | 99.7% | 100.0% | 100%  |
| 0.3                    | 3.3% | 19.4% | 53.2% | 84.0% | 97.0% | 99.7% | 100%  | 100%   | 100%  |
| 0.4                    | 4.3% | 24.5% | 61.6% | 89.3% | 98.4% | 99.9% | 100%  | 100%   | 100%  |
| 0.5                    | 4.6% | 25.6% | 62.7% | 89.6% | 98.5% | 99.9% | 100%  | 100%   | 100%  |

**Current GWAS combined** 8,313 cases, 19,680 controls

( $\alpha = 0.0001$  in stage 1) x ( $\alpha = 0.0001$  in stage 1+2) x ( $\alpha = 5 \times 10^{-8}$ ) in stages 1-4 combined, unselected controls

| Minor allele frequency | OR   |       |       |       |       |       |       |       |       |
|------------------------|------|-------|-------|-------|-------|-------|-------|-------|-------|
|                        | 1.1  | 1.15  | 1.2   | 1.25  | 1.3   | 1.35  | 1.4   | 1.45  | 1.5   |
| 0.05                   | 0.0% | 0.0%  | 0.2%  | 3.9%  | 18.5% | 40.7% | 62.2% | 79.4% | 90.7% |
| 0.1                    | 0.0% | 0.4%  | 9.9%  | 38.0% | 67.0% | 87.1% | 96.5% | 99.3% | 99.9% |
| 0.2                    | 0.1% | 9.6%  | 47.1% | 80.4% | 96.0% | 99.6% | 100%  | 100%  | 100%  |
| 0.3                    | 0.4% | 23.5% | 66.8% | 92.5% | 99.2% | 100%  | 100%  | 100%  | 100%  |
| 0.4                    | 1.0% | 31.4% | 74.5% | 95.5% | 99.6% | 100%  | 100%  | 100%  | 100%  |
| 0.5                    | 1.2% | 32.7% | 75.2% | 95.5% | 99.6% | 100%  | 100%  | 100%  | 100%  |

**Supplementary table 2.** Calculations of statistical power (<http://pngu.mgh.harvard.edu/~purcell/gpc/>) in the current and previous discovery GWAS, and in the total combined samples of the current study.<sup>3</sup>

| chromosome                             | SNP        | position  | Frequency cases | Frequency controls | Risk allele | OR (95% CI)         | P_gemma  | P_logistic |
|----------------------------------------|------------|-----------|-----------------|--------------------|-------------|---------------------|----------|------------|
| <b>Gharavi et al 2011<sup>4</sup></b>  |            |           |                 |                    |             |                     |          |            |
| 1                                      | rs3766404  | 196651832 | 92.7%           | 92.4%              | T           | 1.046 (0.901-1.215) | 6.86E-01 | 7.38E-01   |
| 1                                      | rs6677604  | 196686918 | 95.0%           | 94.4%              | G           | 1.125 (0.941-1.345) | 2.64E-01 | 2.60E-01   |
| 6                                      | rs2856717  | 32670308  | 83.7%           | 80.9%              | G           | 1.213 (1.092-1.347) | 1.59E-01 | 7.21E-03   |
| 6                                      | rs9275596  | 32681631  | 89.7%           | 85.2%              | T           | 1.502 (1.325-1.703) | 1.16E-04 | 4.16E-07   |
| 6                                      | rs9357155  | 32809848  | 86.1%           | 83.4%              | G           | 1.236 (1.105-1.383) | 2.34E-02 | 3.82E-03   |
| 6                                      | rs2071543  | 32811629  | 85.2%           | 82.2%              | G           | 1.247 (1.118-1.391) | 2.17E-02 | 2.23E-03   |
| 6                                      | rs3129269  | 33097614  | 75.6%           | 74.0%              | C           | 1.085 (0.991-1.188) | 7.88E-02 | 1.35E-02   |
| 6                                      | rs1883414  | 33086448  | 79.8%           | 78.7%              | G           | 1.073 (0.974-1.182) | 2.59E-01 | 5.42E-02   |
| 22                                     | rs2412971  | 30494371  | 75.6%           | 70.4%              | G           | 1.298 (1.186-1.420) | 4.77E-08 | 5.24E-09   |
| 22                                     | rs2412973  | 30529631  | 74.7%           | 69.7%              | C           | 1.281 (1.172-1.400) | 1.34E-07 | 1.65E-08   |
| <b>Yu et al 2012<sup>2</sup></b>       |            |           |                 |                    |             |                     |          |            |
| 8                                      | rs2738048  | 6822785   | 73.5%           | 67.5%              | A           | 1.326 (1.215-1.447) | 9.75E-10 | 5.13E-09   |
| 17                                     | rs3803800  | 7462969   | 42.0%           | 37.2%              | A           | 1.226 (1.132-1.327) | 5.42E-05 | 2.67E-06   |
| 17                                     | rs4227     | 7491177   | 27.3%           | 22.5%              | G           | 1.298 (1.188-1.418) | 8.22E-06 | 1.77E-06   |
| 22                                     | rs12537    | 30423460  | 86.3%           | 81.7%              | C           | 1.407 (1.258-1.573) | 1.45E-08 | 2.54E-09   |
| 6                                      | rs2523946  | 29941943  | 57.9%           | 51.1%              | C           | 1.317 (1.217-1.426) | 2.86E-07 | 4.54E-11   |
| 6                                      | rs660895   | 32577380  | 31.1%           | 25.9%              | G           | 1.289 (1.184-1.402) | 8.02E-06 | 1.15E-10   |
| 6                                      | rs1794275  | 32671248  | 18.2%           | 14.1%              | A           | 1.365 (1.232-1.513) | 5.23E-07 | 1.27E-09   |
| <b>Kirylyuk et al 2014<sup>5</sup></b> |            |           |                 |                    |             |                     |          |            |
| 1                                      | rs17019602 | 108188858 | 19.5%           | 18.9%              | G           | 1.054 (0.952-1.166) | 5.79E-01 | 3.12E-01   |
| 9                                      | rs4077515  | 139266496 | 31.6%           | 30.0%              | T           | 1.062 (0.974-1.158) | 1.76E-01 | 1.71E-01   |
| 16                                     | rs11150612 | 31357760  | 69.9%           | 67.1%              | A           | 1.200 (1.099-1.311) | 8.65E-05 | 4.89E-05   |
| 8                                      | rs10086568 | 6900336   | 32.1%           | 28.4%              | A           | 1.195 (1.096-1.303) | 1.72E-05 | 4.98E-05   |

**Supplementary table 3.** Look-up of previously-reported SNPs in the current GWAS discovery sample of 1,434 cases and 10,661 controls

| Imputed HLA allele                | Imputation r <sup>2</sup> | Freq cases | Freq controls | OR (95% CI)         | P        |
|-----------------------------------|---------------------------|------------|---------------|---------------------|----------|
| <b>Yu et al<sup>2</sup></b>       |                           |            |               |                     |          |
| HLA-B*4001                        | 0.97                      | 18.89%     | 16.78%        | 1.301 (1.173-1.443) | 6.34E-07 |
| HLA-DQB1*0302                     | 0.91                      | 8.76%      | 7.15%         | 1.441 (1.248-1.664) | 6.44E-07 |
| HLA-A*1101                        | 0.98                      | 31.46%     | 27.10%        | 1.209 (1.108-1.320) | 2.02E-05 |
| HLA-DRB1*0901                     | 0.97                      | 12.59%     | 16.11%        | 0.746 (0.662-0.840) | 1.29E-06 |
| HLA-DQB1*0303                     | 0.94                      | 12.66%     | 16.38%        | 0.736 (0.653-0.828) | 3.98E-07 |
| HLA-DQA1*0102                     | 0.97                      | 14.98%     | 17.40%        | 0.761 (0.681-0.851) | 1.75E-06 |
| HLA-DQB1*0201                     | 0.94                      | 7.65%      | 10.93%        | 0.693 (0.598-0.803) | 1.01E-06 |
| <b>Gharavi et al<sup>4</sup></b>  |                           |            |               |                     |          |
| HLA-DQB1*0602                     | 0.95                      | 2.86%      | 4.85%         | 0.605 (0.479-0.763) | 2.16E-05 |
| HLA-DRB1*1501                     | 0.93                      | 7.90%      | 9.52%         | 0.730 (0.630-0.846) | 2.91E-05 |
| <b>Kirylyuk et al<sup>5</sup></b> |                           |            |               |                     |          |
| HLA-DQA1*0101                     | 0.97                      | 14.71%     | 10.33%        | 1.299 (1.157-1.458) | 8.95E-06 |
| HLA-DQA1*0102                     | 0.97                      | 14.98%     | 17.40%        | 0.761 (0.681-0.851) | 1.75E-06 |
| HLA-DQB1*0201                     | 0.94                      | 7.65%      | 10.93%        | 0.693 (0.598-0.803) | 1.01E-06 |
| HLA-DQB1*0301                     | 0.91                      | 28.71%     | 24.80%        | 1.191 (1.089-1.301) | 1.25E-04 |
| <b>This study</b>                 |                           |            |               |                     |          |
| HLA-DRB1*04                       | 0.97                      | 16.93%     | 13.67%        | 1.446 (1.297-1.613) | 3.16E-11 |
| HLA-DRB1*0403                     | 0.63                      | 2.96%      | 1.94%         | 1.754 (1.379-2.232) | 4.69E-06 |
| HLA-DRB1*0405                     | 0.96                      | 8.07%      | 6.72%         | 1.292 (1.114-1.498) | 7.19E-04 |
| HLA-DRB1*0404                     | 0.67                      | 1.85%      | 1.46%         | 1.478 (1.100-1.984) | 9.42E-03 |
| HLA-DRB1*0406                     | 0.88                      | 3.35%      | 3.29%         | 1.179 (0.945-1.471) | 1.45E-01 |
| HLA-DRB1*0401                     | 0.68                      | 0.66%      | 0.69%         | 0.990 (0.621-1.579) | 9.67E-01 |
| HLA-DRB1*0410                     | 0.11                      | 0.00%      | 0.11%         | -                   | 9.97E-01 |
| HLA-DPB1*02                       | 0.91                      | 27.95%     | 23.17%        | 1.318 (1.205-1.442) | 1.77E-09 |
| HLA-DPB1*0202                     | 0.89                      | 9.39%      | 7.11%         | 1.328 (1.155-1.527) | 6.63E-05 |
| HLA-DPB1*0201                     | 0.87                      | 18.52%     | 16.15%        | 1.229 (1.109-1.363) | 9.12E-05 |

**Supplementary table 4.** Previously reported and newly-identified HLA alleles associated with IgAN in discovery samples (Stage 1), imputed with the SNP2HLA tool<sup>6</sup>.

| SNP         | Chr:position   | Risk/non-risk allele | Locus                | Northern |          | Southern |          | Combined GWAS + All Validation |       |        |
|-------------|----------------|----------------------|----------------------|----------|----------|----------|----------|--------------------------------|-------|--------|
|             |                |                      |                      | OR       | P        | OR       | P        | P                              | OR    | Phet   |
| rs2738058   | chr8:6821617   | T/C                  | <i>DEFA8P/DEFA1</i>  | 1.245    | 7.08E-05 | 1.327    | 1.92E-06 | 4.28E-21                       | 1.255 | 0.2596 |
| rs7190997   | chr16:31368178 | C/T                  | <i>ITGAX</i>         | 1.064    | 3.01E-01 | 1.129    | 3.91E-02 | 2.01E-16                       | 1.226 | 0.0009 |
| rs2074038   | chr11:44087989 | T/G                  | <i>ACCS</i>          | 1.054    | 3.24E-01 | 1.177    | 4.08E-03 | 1.47E-08                       | 1.145 | 0.2564 |
| rs2033562   | chr8:103547739 | C/G                  | <i>x</i>             | 1.139    | 9.15E-03 | 1.074    | 1.77E-01 | 3.09E-08                       | 1.130 | 0.5769 |
| rs7634389   | chr3:186738421 | C/T                  | <i>ST6GAL1</i>       | 1.176    | 1.48E-03 | 1.075    | 1.80E-01 | 1.01E-07                       | 1.126 | 0.5733 |
| rs9314614   | chr8:6697731   | C/G                  | <i>LOC100652791</i>  | 1.051    | 3.42E-01 | 1.135    | 2.10E-02 | 1.07E-07                       | 1.130 | 0.3186 |
| rs11264799  | chr1:157670757 | C/T                  | <i>FCRL3</i>         | 1.086    | 1.82E-01 | 1.015    | 8.19E-01 | 1.78E-07                       | 1.152 | 0.0571 |
| rs7979707   | chr12:54836257 | C/T                  | <i>GTSF1/ITGA5</i>   | 0.897    | 5.34E-01 | 1.233    | 8.15E-02 | 2.30E-07                       | 1.313 | 0.0731 |
| rs12581651  | chr12:7162598  | A/G                  | <i>x</i>             | 1.242    | 1.20E-01 | 1.209    | 1.39E-01 | 1.70E-06                       | 1.295 | 0.762  |
| rs137975261 | chr16:86556644 | A/G                  | <i>x</i>             | 1.920    | 3.72E-01 | 1.743    | 3.90E-01 | 1.80E-05                       | 2.111 | 0.7546 |
| rs7305528   | chr12:70852590 | A/G                  | <i>x</i>             | 1.004    | 9.44E-01 | 0.978    | 6.92E-01 | 2.34E-05                       | 1.110 | 0.0072 |
| rs75131344  | chr2:61935818  | T/C                  | <i>x</i>             | 1.069    | 3.77E-01 | 1.119    | 2.04E-01 | 2.69E-05                       | 1.165 | 0.1891 |
| rs6773807   | chr3:20220273  | C/T                  | <i>SGOLI</i>         | 0.949    | 7.27E-01 | 1.168    | 2.77E-01 | 1.27E-04                       | 1.248 | 0.0615 |
| rs34104149  | chr1:209318792 | G/T                  | <i>LOC642587</i>     | 0.904    | 2.59E-01 | 1.248    | 3.45E-02 | 1.70E-04                       | 1.180 | 0.002  |
| rs17145884  | chr11:62200176 | T/C                  | <i>AHNAK, ASRGL1</i> | 0.980    | 7.05E-01 | 0.986    | 8.15E-01 | 2.31E-04                       | 1.095 | 0.0013 |
| rs10899844  | chr10:44118060 | T/C                  | <i>x</i>             | 0.996    | 9.46E-01 | 1.096    | 1.26E-01 | 2.39E-04                       | 1.094 | 0.0778 |
| rs11764463  | chr7:105875903 | T/C                  | <i>NAMPT</i>         | 1.041    | 6.06E-01 | 1.048    | 5.30E-01 | 2.58E-04                       | 1.123 | 0.052  |
| rs12868611  | chr13:32444439 | C/T                  | <i>EEF1DP3</i>       | 0.972    | 5.96E-01 | 1.041    | 4.73E-01 | 5.26E-04                       | 1.085 | 0.0237 |
| rs13133504  | chr4:176252966 | C/T                  | <i>x</i>             | 1.089    | 3.13E-01 | 0.946    | 6.16E-01 | 7.20E-04                       | 1.165 | 0.0349 |
| rs3804780   | chr3:4352981   | G/A                  | <i>SETMAR</i>        | 0.966    | 7.08E-01 | 1.055    | 5.82E-01 | 1.37E-03                       | 1.140 | 0.0238 |
| rs6435051   | chr2:201329213 | A/G                  | <i>SPATS2L</i>       | 0.986    | 8.09E-01 | 0.877    | 2.59E-02 | 4.18E-03                       | 1.074 | <0.001 |
| rs2421790   | chr1:71191807  | A/G                  | <i>x</i>             | 0.852    | 3.82E-03 | 1.007    | 9.06E-01 | 9.87E-03                       | 1.066 | <0.001 |

**Supplementary table 5. 22 SNPs analysed in validation 2 samples.**

Risk alleles were defined based on direction of effect at the discovery (GWAS) stage.

| SNP/locus<br>I <sup>2</sup> /P <sub>het</sub> | Risk/non-<br>risk allele | Sample                | Risk allele<br>frequency<br>Cases | Risk allele<br>frequency<br>Controls | P        | OR(95% CI)         | I <sup>2</sup>      | P <sub>het</sub> |       |
|-----------------------------------------------|--------------------------|-----------------------|-----------------------------------|--------------------------------------|----------|--------------------|---------------------|------------------|-------|
| <b>rs11264799</b>                             | C/T                      | GWAS logistic         | 81.0%                             | 77.5%                                | 1.43E-05 | 1.239(1.125-1.365) |                     |                  |       |
|                                               |                          | GWAS gemma            |                                   |                                      | 1.77E-05 |                    |                     |                  |       |
| <b>chr1:157670757</b><br><b><i>FCRL3</i></b>  |                          | Validation 1          | 80.4%                             | 77.5%                                | 1.73E-04 | 1.194(1.088-1.309) |                     |                  |       |
|                                               |                          | Validation 2 Southern | 77.9%                             | 77.6%                                | 8.19E-01 | 1.015(0.894-1.152) |                     |                  |       |
|                                               |                          | Validation 2 Northern | 79.2%                             | 77.8%                                | 1.82E-01 | 1.086(0.962-1.226) |                     |                  |       |
|                                               |                          | Validation 3 Southern | 78.9%                             | 77.2%                                | 1.75E-01 | 1.104(0.957-1.273) |                     |                  |       |
|                                               |                          | Validation 3 Northern | 79.1%                             | 78.9%                                | 8.94E-01 | 1.012(0.849-1.206) |                     |                  |       |
|                                               |                          | All validation        |                                   |                                      |          | 4.42E-04           | 1.104 (1.045-1.166) |                  |       |
|                                               |                          | Meta-analysis         |                                   |                                      |          | 2.00E-07           | 1.135(1.082-1.191)  | 50.4             | 0.090 |

**Supplementary Table 6.** Association results at the suggestive locus 1q23.1

a) Imputation info scores by IMPUTEv2 (info) and minor allele frequencies (maf) in cases and controls, separated by genotyping platform (Illumina array).

|                                     |             | <b>660-Quad<br/>(Cases)</b> | <b>OmniExpress<br/>(Controls)</b> | <b>1M-Duo<br/>(Controls)</b> | <b>550K<br/>(Controls)</b> | <b>610-Quad<br/>(Controls)</b> |
|-------------------------------------|-------------|-----------------------------|-----------------------------------|------------------------------|----------------------------|--------------------------------|
| <b>average info across all SNPs</b> |             | 0.36                        | 0.33                              | 0.33                         | 0.31                       | 0.31                           |
| <b>% info &gt; 0.8</b>              |             | 32.7%                       | 31.8%                             | 32.1%                        | 30.5%                      | 30.7%                          |
| <b>rs2074038</b>                    | <b>info</b> | 0.99                        | 0.98                              | 0.98                         | 0.99                       | 0.99                           |
|                                     | <b>maf</b>  | 32.2%                       | 28.9%                             | 26.7%                        | 28.5%                      | 28.8%                          |
| <b>rs7190997</b>                    | <b>info</b> | 0.95                        | typed                             | typed                        | 0.94                       | 0.97                           |
|                                     | <b>maf</b>  | 27.3%                       | 31.8%                             | 30.7%                        | 29.4%                      | 30.1%                          |
| <b>rs7634389</b>                    | <b>info</b> | 0.98                        | 0.98                              | 0.98                         | 0.99                       | 0.98                           |
|                                     | <b>maf</b>  | 47.4%                       | 43.8%                             | 45.3%                        | 42.1%                      | 42.9%                          |
| <b>rs9314614</b>                    | <b>info</b> | 0.99                        | 0.99                              | 0.99                         | 0.99                       | 0.99                           |
|                                     | <b>maf</b>  | 39.7%                       | 35.5%                             | 35.3%                        | 37.0%                      | 36.1%                          |
| <b>rs2738058</b>                    | <b>info</b> | typed                       | 0.99                              | typed                        | typed                      | typed                          |
|                                     | <b>maf</b>  | 27.0%                       | 33.9%                             | 34.1%                        | 33.0%                      | 33.2%                          |
| <b>rs12716641</b>                   | <b>info</b> | 0.99                        | 0.99                              | 0.99                         | 0.99                       | 0.99                           |
|                                     | <b>maf</b>  | 21.7%                       | 26.7%                             | 25.1%                        | 25.9%                      | 25.2%                          |
| <b>rs2033562</b>                    | <b>info</b> | 1.00                        | 1.00                              | 1.00                         | 0.99                       | 1.00                           |
|                                     | <b>maf</b>  | 51.4%                       | 48.4%                             | 46.8%                        | 46.6%                      | 47.8%                          |

b) Association results in the full expanded GWAS dataset compared to the subset of samples from the previous GWAS (adjusted for principal components previously calculated)<sup>2</sup>.

| SNP/locus<br>Risk/non-risk<br>allele                  | SNP type  | Risk allele<br>frequency<br>Cases | Expanded GWAS<br>(1434 cases, 10,661 controls) |                        |          | Previous GWAS <sup>2</sup><br>(1434 cases, 4270 controls) |                        |          |
|-------------------------------------------------------|-----------|-----------------------------------|------------------------------------------------|------------------------|----------|-----------------------------------------------------------|------------------------|----------|
|                                                       |           |                                   | Risk allele<br>frequency<br>Controls           | OR<br>(95% CI)         | P        | Risk allele<br>frequency<br>Controls                      | OR<br>(95% CI)         | P        |
| rs2738058<br>8:6821617<br><i>DEFA8P</i><br>T/C        | genotyped | 73.0%                             | 66.6%                                          | 1.310<br>(1.203-1.427) | 5.75E-10 | 67.4%                                                     | 1.289<br>(1.173-1.415) | 1.16E-07 |
| rs7190997<br>16:31368178<br><i>ITGAX-ITGAM</i><br>C/T | imputed   | 72.0%                             | 69.2%                                          | 1.207<br>(1.103-1.320) | 4.00E-05 | 70.0%                                                     | 1.219<br>(1.106-1.343) | 6.79E-05 |
| rs2074038<br>11:44087989<br><i>ACCS</i><br>T/G        | imputed   | 32.3%                             | 28.8%                                          | 1.207<br>(1.104-1.319) | 3.36E-05 | 28.1%                                                     | 1.248<br>(1.134-1.375) | 6.31E-06 |
| rs2033562<br>8:103547739<br><i>KLF10/ODF1</i><br>C/G  | imputed   | 51.4%                             | 47.7%                                          | 1.176<br>(1.085-1.274) | 7.98E-05 | 47.7%                                                     | 1.161<br>(1.065-1.266) | 7.18E-04 |
| rs7634389<br>3:186738421<br><i>ST6GAL1</i><br>C/T     | imputed   | 47.4%                             | 43.5%                                          | 1.151<br>(1.061-1.248) | 6.80E-04 | 43.5%                                                     | 1.164<br>(1.066-1.270) | 7.17E-04 |
| rs9314614<br>8:6697731<br><i>XKR5</i><br>C/G          | imputed   | 39.7%                             | 36.0%                                          | 1.191<br>(1.097-1.295) | 3.54E-05 | 36.2%                                                     | 1.166<br>(1.067-1.275) | 7.24E-04 |
| rs12716641<br>8:6898998<br><i>DEFA7P</i><br>T/C       | imputed   | 78.0%                             | 74.3%                                          | 1.260<br>(1.150-1.381) | 7.80E-07 | 75.2%                                                     | 1.227<br>(1.109-1.356) | 6.76E-05 |

**Supplementary table 7.** Exclusion of batch effects influencing results at the top 7 SNPs

- a) Discovery GWAS (Stage 1) results from separate analyses of discovery GWAS samples in two clusters of Northern and Southern Chinese samples (Supplementary figure 3) with adjustment of the first five principal components in each stage. These are compared with results from the original analysis combining Northern and Southern Chinese samples with adjustment of the first five principal components.

| SNP        | Risk allele       | Northern cluster, 414 cases, 2306 controls |       |             | Southern cluster, 1020 cases, 8355 controls |       |             |                     |
|------------|-------------------|--------------------------------------------|-------|-------------|---------------------------------------------|-------|-------------|---------------------|
|            |                   | F A                                        | F U   | OR (95% CI) | F A                                         | F U   | OR (95% CI) |                     |
| rs7634389  | <i>ST6GAL1</i>    | C                                          | 47.0% | 44.7%       | 1.088 (0.922-1.283)                         | 47.6% | 42.8%       | 1.173 (1.067-1.291) |
| rs9314614  | <i>XKR5</i>       | C                                          | 40.3% | 37.4%       | 1.151 (0.978-1.355)                         | 39.5% | 35.6%       | 1.201 (1.088-1.326) |
| rs2738058  | <i>DEFA8P</i>     | T                                          | 73.6% | 67.4%       | 1.331 (1.115-1.588)                         | 72.8% | 66.4%       | 1.310 (1.185-1.448) |
| rs12716641 | <i>DEFA7P</i>     | T                                          | 80.0% | 77.0%       | 1.241 (1.024-1.505)                         | 77.7% | 73.8%       | 1.257 (1.130-1.398) |
| rs2033562  | <i>KLF10/ODF1</i> | C                                          | 52.8% | 47.7%       | 1.238 (1.054-1.454)                         | 50.8% | 47.7%       | 1.160 (1.055-1.275) |
| rs2074038  | <i>ACCS</i>       | T                                          | 34.0% | 33.0%       | 1.115 (0.943-1.318)                         | 31.5% | 27.4%       | 1.248 (1.122-1.389) |
| rs7190997  | <i>ITGAX</i>      | C                                          | 77.8% | 74.6%       | 1.337 (1.109-1.611)                         | 70.8% | 68.2%       | 1.169 (1.053-1.297) |

| SNP        | Locus             | Risk allele | Meta-analysis of North and South |                                          |                  |                | Original analysis (combined)             |                                       |
|------------|-------------------|-------------|----------------------------------|------------------------------------------|------------------|----------------|------------------------------------------|---------------------------------------|
|            |                   |             | OR                               | P <sup>logistic</sup><br>$\lambda=1.079$ | P <sub>het</sub> | I <sup>2</sup> | P <sup>logistic</sup><br>$\lambda=1.087$ | P <sub>gemma</sub><br>$\lambda=1.039$ |
| rs7634389  | <i>ST6GAL1</i>    | C           | 1.151                            | 8.15E-04                                 | 0.437            | 0              | 6.80E-04                                 | 4.33E-05                              |
| rs9314614  | <i>XKR5</i>       | C           | 1.187                            | 6.99E-05                                 | 0.666            | 0              | 3.54E-05                                 | 6.20E-05                              |
| rs2738058  | <i>DEFA8P</i>     | T           | 1.315                            | 8.04E-10                                 | 0.879            | 0              | 5.75E-10                                 | 1.51E-10                              |
| rs12716641 | <i>DEFA7P</i>     | T           | 1.253                            | 2.08E-06                                 | 0.912            | 0              | 7.80E-07                                 | 1.79E-06                              |
| rs2033562  | <i>KLF10/ODF1</i> | C           | 1.179                            | 7.68E-05                                 | 0.494            | 0              | 7.98E-05                                 | 4.14E-04                              |
| rs2074038  | <i>ACCS</i>       | T           | 1.208                            | 3.66E-05                                 | 0.264            | 19.98          | 3.36E-05                                 | 4.45E-05                              |
| rs7190997  | <i>ITGAX</i>      | C           | 1.207                            | 5.35E-05                                 | 0.219            | 33.85          | 4.00E-05                                 | 1.94E-05                              |



b) Meta-analysis across stages 1-4 for all Northern (2,581 cases, 4,794 controls) and Southern (5,732 cases, 14,886 controls) samples.

| SNP/locus        | Risk/non-risk allele | Sample                | Risk allele frequency Cases | Risk allele frequency Controls | P        | OR (95% CI)         | P <sub>het</sub>    | P <sub>het</sub> North vs South |  |
|------------------|----------------------|-----------------------|-----------------------------|--------------------------------|----------|---------------------|---------------------|---------------------------------|--|
| <b>rs7634389</b> | <b>C/T</b>           | GWAS Southern         | 47.6%                       | 42.8%                          | 1.01E-03 | 1.173 (1.067-1.291) |                     |                                 |  |
|                  |                      | Validation 1          | 46.2%                       | 43.7%                          | 8.86E-03 | 1.105 (1.026-1.191) |                     |                                 |  |
|                  |                      | Validation 2 Southern | 46.1%                       | 44.3%                          | 1.80E-01 | 1.075 (0.968-1.194) |                     |                                 |  |
|                  |                      | Validation 3 Southern | 47.0%                       | 42.8%                          | 5.94E-03 | 1.180 (1.049-1.328) |                     |                                 |  |
|                  |                      | <b>3:186738421</b>    | All Southern                |                                |          | 6.52E-07            | 1.127 (1.075-1.181) | 0.510                           |  |
|                  |                      | <b>ST6GAL1</b>        | GWAS Northern               | 47.0%                          | 44.7%    | 3.18E-01            | 1.088 (0.922-1.283) |                                 |  |
|                  |                      | Validation 2 Northern | 46.6%                       | 42.6%                          | 1.48E-03 | 1.176 (1.064-1.300) |                     |                                 |  |
|                  |                      | Validation 3 Northern | 46.7%                       | 43.8%                          | 1.09E-01 | 1.124 (0.974-1.297) |                     |                                 |  |
|                  |                      | All Northern          |                             |                                | 3.16E-04 | 1.144 (1.063-1.232) | 0.702               |                                 |  |
|                  |                      | Combined              |                             |                                | 8.65E-10 | 1.132 (1.088-1.178) | 0.791               | 0.729                           |  |
| <b>rs9314614</b> | <b>C/G</b>           | GWAS Southern         | 39.5%                       | 35.6%                          | 2.90E-04 | 1.201 (1.088-1.326) |                     |                                 |  |
|                  |                      | Validation 1          | 37.7%                       | 35.0%                          | 3.77E-03 | 1.121 (1.038-1.211) |                     |                                 |  |
|                  |                      | Validation 2 Southern | 38.6%                       | 35.6%                          | 2.10E-02 | 1.135 (1.019-1.264) |                     |                                 |  |
|                  |                      | Validation 3 Southern | 38.4%                       | 36.0%                          | 1.03E-01 | 1.108 (0.980-1.253) |                     |                                 |  |
|                  |                      | <b>8:6697731</b>      | All Southern                |                                |          | 1.14E-07            | 1.141 (1.086-1.197) | 0.693                           |  |
|                  |                      | <b>XKR5</b>           | GWAS Northern               | 40.3%                          | 37.4%    | 9.05E-02            | 1.151 (0.978-1.355) |                                 |  |
|                  |                      | Validation 2 Northern | 40.2%                       | 39.1%                          | 3.42E-01 | 1.051 (0.948-1.165) |                     |                                 |  |
|                  |                      | Validation 3 Northern | 41.9%                       | 36.8%                          | 4.85E-03 | 1.234 (1.066-1.428) |                     |                                 |  |
|                  |                      | All Northern          |                             |                                | 3.66E-03 | 1.117 (1.037-1.204) | 0.196               |                                 |  |
|                  |                      | Combined              |                             |                                | 1.63E-09 | 1.134 (1.088-1.181) | 0.554               | 0.651                           |  |
| <b>rs2738058</b> | <b>T/C</b>           | GWAS Southern         | 72.8%                       | 66.4%                          | 1.37E-07 | 1.310 (1.185-1.448) |                     |                                 |  |
|                  |                      | Validation 1          | 72.4%                       | 69.0%                          | 6.10E-05 | 1.181 (1.089-1.281) |                     |                                 |  |
|                  |                      | Validation 2 Southern | 71.9%                       | 66.0%                          | 1.92E-06 | 1.327 (1.181-1.491) |                     |                                 |  |
|                  |                      | Validation 3 Southern | 72.6%                       | 67.3%                          | 8.74E-05 | 1.303 (1.142-1.487) |                     |                                 |  |
|                  |                      | <b>8:6821617</b>      | All Southern                |                                |          | 1.13E-18            | 1.260 (1.197-1.326) | 0.261                           |  |
|                  |                      | <b>DEFA8P</b>         | GWAS Northern               | 73.6%                          | 67.4%    | 1.55E-03            | 1.331 (1.115-1.588) |                                 |  |
|                  |                      | Validation 2 Northern | 72.3%                       | 67.6%                          | 7.08E-05 | 1.245 (1.117-1.386) |                     |                                 |  |

|                    |            |                       |       |       |          |                     |       |       |
|--------------------|------------|-----------------------|-------|-------|----------|---------------------|-------|-------|
|                    |            | Validation 3 Northern | 73.4% | 67.0% | 1.64E-04 | 1.354 (1.156-1.585) |       |       |
|                    |            | All Northern          |       |       | 4.04E-10 | 1.289 (1.190-1.396) | 0.637 |       |
|                    |            | Combined              |       |       | 3.38E-27 | 1.268 (1.215-1.324) | 0.526 | 0.633 |
| <b>rs12716641</b>  | <b>T/C</b> | GWAS Southern         | 77.7% | 73.8% | 2.61E-05 | 1.257 (1.130-1.398) |       |       |
|                    |            | Validation 1          | 78.2% | 73.6% | 1.22E-08 | 1.287 (1.180-1.404) |       |       |
|                    |            | Validation 2 Southern | 78.8% | 75.2% | 1.81E-03 | 1.219 (1.076-1.381) |       |       |
| <b>8:6898998</b>   |            | Validation 3 Southern | 78.7% | 75.5% | 1.00E-02 | 1.204 (1.045-1.386) |       |       |
| <b>DEFA7P</b>      |            | All Southern          |       |       | 5.73E-16 | 1.253 (1.187-1.324) | 0.835 |       |
|                    |            | GWAS Northern         | 80.0% | 77.0% | 2.77E-02 | 1.241 (1.024-1.505) |       |       |
|                    |            | Validation 2 Northern | 80.4% | 78.4% | 5.44E-02 | 1.129 (0.998-1.278) |       |       |
|                    |            | Validation 3 Northern | 80.5% | 77.4% | 3.85E-02 | 1.207 (1.010-1.442) |       |       |
|                    |            | All Northern          |       |       | 5.23E-04 | 1.173 (1.072-1.283) | 0.673 |       |
|                    |            | Combined              |       |       | 2.80E-18 | 1.231 (1.175-1.290) | 0.785 | 0.216 |
| <b>rs2033562</b>   | <b>C/G</b> | GWAS Southern         | 50.8% | 47.7% | 2.23E-03 | 1.160 (1.055-1.275) |       |       |
|                    |            | Validation 1          | 50.5% | 47.7% | 3.45E-03 | 1.116 (1.037-1.201) |       |       |
|                    |            | Validation 2 Southern | 50.6% | 48.8% | 1.77E-01 | 1.074 (0.968-1.192) |       |       |
| <b>8:103547739</b> |            | Validation 3 Southern | 49.8% | 49.0% | 5.90E-01 | 1.033 (0.918-1.163) |       |       |
| <b>KLF10/ODF1</b>  |            | All Southern          |       |       | 3.12E-05 | 1.104 (1.054-1.157) | 0.458 |       |
|                    |            | GWAS Northern         | 52.8% | 47.7% | 9.34E-03 | 1.238 (1.054-1.454) |       |       |
|                    |            | Validation 2 Northern | 50.8% | 47.4% | 9.15E-03 | 1.139 (1.033-1.256) |       |       |
|                    |            | Validation 3 Northern | 50.9% | 45.0% | 1.35E-03 | 1.265 (1.096-1.460) |       |       |
|                    |            | All Northern          |       |       | 2.57E-06 | 1.190 (1.107-1.279) | 0.429 |       |
|                    |            | Combined              |       |       | 1.45E-09 | 1.129 (1.085-1.174) | 0.308 | 0.091 |
| <b>rs2074038</b>   | <b>T/G</b> | GWAS Southern         | 31.5% | 27.4% | 4.44E-05 | 1.248 (1.122-1.389) |       |       |
|                    |            | Validation 1          | 31.3% | 28.6% | 1.87E-03 | 1.137 (1.049-1.233) |       |       |
|                    |            | Validation 2 Southern | 32.5% | 28.9% | 4.08E-03 | 1.177 (1.053-1.315) |       |       |
| <b>11:44087989</b> |            | Validation 3 Southern | 30.4% | 29.1% | 3.42E-01 | 1.066 (0.935-1.216) |       |       |
| <b>ACCS</b>        |            | All Southern          |       |       | 1.69E-08 | 1.159 (1.101-1.220) | 0.294 |       |
|                    |            | GWAS Northern         | 34.0% | 33.0% | 2.05E-01 | 1.115 (0.943-1.318) |       |       |

|                  |            |                       |       |       |          |                     |       |       |
|------------------|------------|-----------------------|-------|-------|----------|---------------------|-------|-------|
|                  |            | Validation 2 Northern | 34.8% | 33.6% | 3.24E-01 | 1.054 (0.950-1.170) |       |       |
|                  |            | Validation 3 Northern | 35.6% | 32.7% | 1.03E-01 | 1.134 (0.975-1.318) |       |       |
|                  |            | All Northern          |       |       | 3.30E-02 | 1.086 (1.007-1.173) | 0.695 |       |
|                  |            | Combined              |       |       | 4.35E-09 | 1.136 (1.089-1.185) | 0.385 | 0.167 |
| <b>rs7190997</b> | <b>C/T</b> | GWAS Southern         | 70.8% | 68.2% | 3.41E-03 | 1.169 (1.053-1.297) |       |       |
|                  |            | Validation 1          | 73.5% | 66.7% | 3.35E-15 | 1.386 (1.278-1.503) |       |       |
|                  |            | Validation 2 Southern | 71.9% | 69.3% | 3.91E-02 | 1.129 (1.006-1.267) |       |       |
|                  |            | Validation 3 Southern | 72.9% | 68.4% | 1.16E-03 | 1.239 (1.089-1.411) |       |       |
|                  |            | All Southern          |       |       | 6.24E-18 | 1.254 (1.191-1.320) | 0.013 |       |
|                  |            | GWAS Northern         | 77.8% | 74.6% | 2.35E-03 | 1.337 (1.109-1.611) |       |       |
|                  |            | Validation 2 Northern | 77.3% | 76.2% | 3.01E-01 | 1.064 (0.946-1.196) |       |       |
|                  |            | Validation 3 Northern | 77.5% | 74.7% | 7.30E-02 | 1.166 (0.986-1.379) |       |       |
|                  |            | All Northern          |       |       | 2.23E-03 | 1.143 (1.049-1.245) | 0.123 |       |
|                  |            | Combined              |       |       | 2.98E-19 | 1.223 (1.171-1.279) | 0.005 | 0.067 |

**Supplementary table 8.** Comparisons of association results in Northern and Southern Chinese samples

| rsId       | Locus             | OR    | Stage 1 P |          | Stage 1 SE |          | Meta-analysis |          |
|------------|-------------------|-------|-----------|----------|------------|----------|---------------|----------|
|            |                   |       | original  | adjusted | original   | adjusted | original      | adjusted |
| rs7634389  | <i>ST6GALI</i>    | 1.151 | 6.80E-04  | 1.12E-03 | 0.041      | 0.043    | 7.27E-10      | 1.16E-09 |
| rs9314614  | <i>XKR5</i>       | 1.191 | 3.54E-05  | 7.29E-05 | 0.042      | 0.044    | 9.48E-10      | 1.81E-09 |
| rs2738058  | <i>DEFA8P</i>     | 1.310 | 5.75E-10  | 2.78E-09 | 0.044      | 0.045    | 2.31E-27      | 1.06E-26 |
| rs12716641 | <i>DEFA7P</i>     | 1.260 | 7.80E-07  | 2.15E-06 | 0.047      | 0.049    | 1.13E-18      | 3.02E-18 |
| rs2033562  | <i>KLF10/ODF1</i> | 1.176 | 7.98E-05  | 1.54E-04 | 0.041      | 0.043    | 1.41E-09      | 2.57E-09 |
| rs2074038  | <i>ACCS</i>       | 1.207 | 3.36E-05  | 6.94E-05 | 0.045      | 0.047    | 3.93E-09      | 7.39E-09 |
| rs7190997  | <i>ITGAX</i>      | 1.207 | 4.00E-05  | 8.15E-05 | 0.046      | 0.048    | 2.26E-19      | 4.46E-19 |

**Supplementary table 9.** Impact of adjusting for lambda GC (lambda=1.087) at the discovery stage (Stage 1) and in the meta-analysis across all four stages.

- a) Association results with and without adjusting for age and gender in the meta-analysis across all four stages, in the subset of samples (6,323 cases, 17,349 controls; 84.6%) for which this information is available.

| Locus             | CHR | SNP        | BP        | Risk/non-risk allele | Without adjustment for age and gender |                     | With adjustment for age and gender |                     |
|-------------------|-----|------------|-----------|----------------------|---------------------------------------|---------------------|------------------------------------|---------------------|
|                   |     |            |           |                      | P                                     | OR (95% CI)         | P                                  | OR (95% CI)         |
| <i>ST6GAL1</i>    | 3   | rs7634389  | 186738421 | C/T                  | 1.27E-09                              | 1.145 (1.096-1.196) | 3.85E-09                           | 1.143 (1.093-1.195) |
| <i>XKR5</i>       | 8   | rs9314614  | 6697731   | C/G                  | 7.13E-10                              | 1.151 (1.101-1.204) | 6.61E-09                           | 1.145 (1.094-1.198) |
| <i>DEFA8P</i>     | 8   | rs2738058  | 6821617   | T/C                  | 6.27E-22                              | 1.266 (1.207-1.329) | 1.17E-22                           | 1.278 (1.217-1.342) |
| <i>DEFA7P</i>     | 8   | rs12716641 | 6898998   | T/C                  | 1.34E-15                              | 1.239 (1.176-1.306) | 7.80E-16                           | 1.247 (1.182-1.316) |
| <i>KLF10/ODF1</i> | 8   | rs2033562  | 103547739 | C/G                  | 4.26E-09                              | 1.139 (1.091-1.190) | 2.65E-08                           | 1.134 (1.085-1.185) |
| <i>ACCS</i>       | 11  | rs2074038  | 44087989  | T/G                  | 6.33E-07                              | 1.126 (1.075-1.180) | 1.13E-06                           | 1.126 (1.073-1.181) |
| <i>ITGAX</i>      | 16  | rs7190997  | 31368178  | C/T                  | 1.29E-12                              | 1.194 (1.137-1.254) | 4.58E-12                           | 1.193 (1.135-1.254) |

- b) Stratified analysis in males and females, among 6,391 cases and 17,364 controls with gender information available. Association results are based on the meta-analysis across all four stages.

| Locus             | CHR | SNP        | BP        | Males (3,067 cases, 9,993 controls) |                     | Females (3,324 cases, 7,371 controls) |                     | $P_{het}$ males/females |
|-------------------|-----|------------|-----------|-------------------------------------|---------------------|---------------------------------------|---------------------|-------------------------|
|                   |     |            |           | P                                   | OR (95% CI)         | P                                     | OR (95% CI)         |                         |
| <i>ST6GAL1</i>    | 3   | rs7634389  | 186738421 | 3.87E-05                            | 1.137 (1.069-1.208) | 1.07E-05                              | 1.152 (1.082-1.227) | 0.766                   |
| <i>XKR5</i>       | 8   | rs9314614  | 6697731   | 1.94E-05                            | 1.146 (1.077-1.220) | 5.07E-06                              | 1.162 (1.089-1.239) | 0.764                   |
| <i>DEFA8P</i>     | 8   | rs2738058  | 6821617   | 2.65E-12                            | 1.274 (1.190-1.363) | 2.57E-11                              | 1.262 (1.178-1.351) | 0.844                   |
| <i>DEFA7P</i>     | 8   | rs12716641 | 6898998   | 1.55E-07                            | 1.219 (1.132-1.312) | 3.61E-09                              | 1.253 (1.163-1.350) | 0.606                   |
| <i>KLF10/ODF1</i> | 8   | rs2033562  | 103547739 | 1.74E-05                            | 1.142 (1.075-1.213) | 1.88E-04                              | 1.126 (1.058-1.199) | 0.755                   |
| <i>ACCS</i>       | 11  | rs2074038  | 44087989  | 4.67E-03                            | 1.099 (1.029-1.173) | 3.79E-05                              | 1.152 (1.077-1.233) | 0.321                   |
| <i>ITGAX</i>      | 16  | rs7190997  | 31368178  | 5.74E-07                            | 1.189 (1.111-1.273) | 2.93E-06                              | 1.184 (1.103-1.271) | 0.932                   |

**Supplementary table 10.** Impact of adjusting for age and gender on the association results

| SNP/locus                              | Risk/non-risk allele | Sample        |          | Risk allele frequency Cases | Risk allele frequency Controls | P        | OR(95% CI)          |
|----------------------------------------|----------------------|---------------|----------|-----------------------------|--------------------------------|----------|---------------------|
| rs6677604<br>1:196686918<br><i>CFH</i> | G/A                  | GWAS          | Combined | 95.0%                       | 94.4%                          | 2.60E-01 | 1.107 (0.927-1.322) |
|                                        |                      |               | Northern | 94.8%                       | 93.1%                          | 1.40E-01 | 1.310 (0.915-1.874) |
|                                        |                      |               | Southern | 95.0%                       | 94.8%                          | 7.17E-01 | 1.041 (0.836-1.296) |
|                                        |                      | Validation 2  | Northern | 94.3%                       | 92.6%                          | 7.34E-03 | 1.327 (1.079-1.633) |
|                                        |                      |               | Southern | 95.3%                       | 94.4%                          | 1.24E-01 | 1.212 (0.949-1.548) |
|                                        |                      | Validation 3  | Northern | 92.8%                       | 91.9%                          | 3.70E-01 | 1.130 (0.865-1.478) |
|                                        |                      |               | Southern | 95.3%                       | 94.7%                          | 3.34E-01 | 1.146 (0.869-1.513) |
|                                        |                      | Combined      | Northern |                             |                                | 2.35E-03 | 1.260 (1.086-1.463) |
|                                        |                      |               | Southern |                             |                                | 1.08E-01 | 1.122 (0.975-1.292) |
|                                        |                      | $P_{het}/I^2$ | 0.70/0   |                             | All                            |          |                     |

**Supplementary table 11.** Association at the *CFH* locus in Stage 1, 3 and 4 samples, comparing effects in Northern and Southern Chinese samples.

| Haplotype<br>rs9314614-<br>rs2738058-<br>rs12716641 | # risk<br>alleles | P        | Average<br>frequency<br>(controls) | OR (each<br>vs all) | Phet  | OR with CTT<br>as reference |
|-----------------------------------------------------|-------------------|----------|------------------------------------|---------------------|-------|-----------------------------|
| CTT                                                 | 3                 | 4.71E-22 | 24.6%                              | 1.257               | 0.365 | 1.000                       |
| CTC                                                 | 2                 | 7.88E-01 | 4.0%                               | 0.987               | 0.914 | 0.850                       |
| CCT                                                 | 2                 | 1.95E-01 | 3.7%                               | 0.934               | 0.284 | 0.792                       |
| GTT                                                 | 2                 | 1.34E-03 | 34.2%                              | 1.068               | 0.738 | 0.896                       |
| CCC                                                 | 1                 | 4.20E-05 | 3.9%                               | 0.809               | 0.689 | 0.709                       |
| GTC                                                 | 1                 | 2.31E-02 | 4.5%                               | 0.898               | 0.004 | 0.767                       |
| GCT                                                 | 1                 | 9.74E-08 | 13.4%                              | 0.847               | 0.060 | 0.744                       |
| GCC                                                 | 0                 | 3.51E-13 | 11.5%                              | 0.777               | 0.643 | 0.688                       |

**Supplementary table 12.** Haplotype analysis of three independent SNPs identified at the *DEFA* locus, showing the presence of eight different haplotypes at frequencies expected at linkage equilibrium, and a general trend/additive effect between the number of risk alleles carried by each haplotype and the odds ratio of that haplotype.

| SNP/Locus            | Physical location                                                                                                                                                                                                                                                                                                                          | eQTL/ENCODE                                                                                                                                                                                                                                                                                                                                                                                                                                                                                                                                                                             | Other diseases                                                                                                                                                                                                                                                                                                                                                                                                                                            | Known functions of genes                                                                                                                                                                                                                                                                                                                                                                                                                                                                                                                                                         |
|----------------------|--------------------------------------------------------------------------------------------------------------------------------------------------------------------------------------------------------------------------------------------------------------------------------------------------------------------------------------------|-----------------------------------------------------------------------------------------------------------------------------------------------------------------------------------------------------------------------------------------------------------------------------------------------------------------------------------------------------------------------------------------------------------------------------------------------------------------------------------------------------------------------------------------------------------------------------------------|-----------------------------------------------------------------------------------------------------------------------------------------------------------------------------------------------------------------------------------------------------------------------------------------------------------------------------------------------------------------------------------------------------------------------------------------------------------|----------------------------------------------------------------------------------------------------------------------------------------------------------------------------------------------------------------------------------------------------------------------------------------------------------------------------------------------------------------------------------------------------------------------------------------------------------------------------------------------------------------------------------------------------------------------------------|
| rs7190997<br>16p11.2 | <ul style="list-style-type: none"> <li>Lies within an intron of the <i>ITGAX</i> gene</li> <li>In LD with a missense SNP in <i>ITGAX</i> rs2230429 p.Pro517Arg (<math>r^2=0.84</math> in 1000 genomes Asians)<sup>10</sup> and the previously reported rs<sup>1</sup>1150612 (<math>r^2=0.88</math> in our samples)<sup>5</sup></li> </ul> | <ul style="list-style-type: none"> <li>Risk allele is strongly associated with increased expression levels of the <i>ITGAX</i> gene (<math>P&lt;9.81 \times 10^{-198}</math>) in peripheral blood cells, monocytes (rs7206295, <math>r^2=0.82</math>, <math>P=7.75 \times 10^{-9}</math>) and also of the <i>ITGAM</i> gene in peripheral blood cells (<math>P=1.36 \times 10^{-24}</math>) and monocytes (<math>P=6.51 \times 10^{-7}</math>).</li> <li>In LD (<math>r^2&gt;0.8</math>) with SNPs predicted to affect transcription factor binding and chromatin structure.</li> </ul> | <ul style="list-style-type: none"> <li>Variants at this locus have previously been associated with systemic lupus erythematosus (SLE) in European populations<sup>13-14</sup></li> <li>Reported SLE risk alleles and those in LD with these SNPs in HapMap Europeans are either very rare (MAF &lt;1%) or absent in both our samples and HapMap Asians.</li> <li>Risk alleles for SLE are generally protective against IgAN.<sup>5,15,16</sup></li> </ul> | <ul style="list-style-type: none"> <li><i>ITGAX</i> encodes the integrin alpha X chain protein, which combines with the beta 2 chain (encoded by <i>ITGB2</i>) to form a leukocyte-specific integrin hetero dimer complex referred to as inactivated-C3b receptor 4 (CR4).</li> <li>This complex is known to play a role in the adherence of neutrophils and monocytes to stimulated endothelium cells and in the phagocytosis of complement-coated particles.</li> <li><i>ITGAM</i> is known to regulate IgA-producing cells in the intestines of mice.<sup>12</sup></li> </ul> |
| rs9314614<br>8p23    | <ul style="list-style-type: none"> <li>Located in the intron of the long-coding RNA <i>GSI-24F4.2</i>. 30kb away from <i>DEFB1</i> and adjacent to <i>XKR5</i> X Kell Blood Group Precursor-Related Family</li> </ul>                                                                                                                      | <ul style="list-style-type: none"> <li>Risk allele is associated with expression of the gene <i>DEFB1</i> (tagged by rs2977798; <math>r^2&gt;0.8</math>) in monocytes (<math>P=4.22 \times 10^{-4}</math>)</li> <li>May affect chromatin structure, binding of CTCF and other proteins</li> </ul>                                                                                                                                                                                                                                                                                       | <ul style="list-style-type: none"> <li>Not previously associated with any other trait.</li> </ul>                                                                                                                                                                                                                                                                                                                                                         | <ul style="list-style-type: none"> <li><i>DEFB1</i> involved in immune response</li> <li>Member of the defensin family, microbicidal and cytotoxic peptides produced by neutrophils</li> <li>Antimicrobial peptide, may be involved in resistance of epithelial surfaces to microbial colonization</li> </ul>                                                                                                                                                                                                                                                                    |

**Supplementary table 13.** Functional annotations of recently reported loci and associated SNPs (details on eQTLs and ENCODE annotations in Supplementary tables 14-15, Supplementary data 2 and 3)<sup>5,7-16</sup>



| chromosome | Position | SNP id     | R2%      | Candidate gene* | Meta z score^ | Meta p value # | Alleles | Allele assessed |
|------------|----------|------------|----------|-----------------|---------------|----------------|---------|-----------------|
| 11         | 44085687 | rs7127924  | 0.995501 | <i>ACCS</i>     | 31.79866      | 9.81E-198      | C/A     | A               |
| 11         | 44087989 | rs2074038  | 1        | <i>ACCS</i>     | 42.79569      | 9.81E-198      | G/T     | T               |
| 11         | 44091399 | rs7951555  | 0.891488 | <i>ACCS</i>     | 35.36956      | 9.81E-198      | A/G     | G               |
| 11         | 44093323 | rs2074040  | 0.867031 | <i>ACCS</i>     | 35.4295       | 9.81E-198      | C/G     | G               |
| 16         | 31336519 | rs7206295  | 0.832116 | <i>ITGAX</i>    | -40.2033      | 9.81E-198      | C/T     | T               |
| 16         | 31340909 | rs4077810  | 0.86951  | <i>ITGAX</i>    | -39.6776      | 9.81E-198      | C/T     | T               |
| 16         | 31343653 | rs3087796  | 0.87255  | <i>ITGAX</i>    | -40.5388      | 9.81E-198      | G/A     | A               |
| 16         | 31343769 | rs4597342  | 0.872532 | <i>ITGAX</i>    | -40.5394      | 9.81E-198      | C/T     | T               |
| 16         | 31347557 | rs9673519  | 0.887398 | <i>ITGAX</i>    | -40.5783      | 9.81E-198      | C/T     | T               |
| 16         | 31348233 | rs4075052  | 0.887373 | <i>ITGAX</i>    | -40.586       | 9.81E-198      | C/A     | A               |
| 16         | 31348848 | rs4608351  | 0.88758  | <i>ITGAX</i>    | -40.602       | 9.81E-198      | C/T     | T               |
| 16         | 31355657 | rs11150611 | 0.895089 | <i>ITGAX</i>    | -40.6253      | 9.81E-198      | G/C     | C               |
| 16         | 31357810 | rs11150613 | 0.896697 | <i>ITGAX</i>    | -40.1915      | 9.81E-198      | T/C     | C               |
| 16         | 31361643 | rs4459557  | 0.912921 | <i>ITGAX</i>    | -40.8901      | 9.81E-198      | C/G     | G               |
| 16         | 31363977 | rs11574631 | 0.877172 | <i>ITGAX</i>    | -42.0613      | 9.81E-198      | T/C     | C               |
| 16         | 31366016 | rs11150614 | 0.979853 | <i>ITGAX</i>    | -42.1303      | 9.81E-198      | G/A     | A               |
| 16         | 31368178 | rs7190997  | 1        | <i>ITGAX</i>    | 30.95974      | 9.81E-198      | C/T     | C               |
| 16         | 31360944 | rs12923297 | 0.887421 | <i>ITGAX</i>    | -28.0678      | 2.42E-173      | T/C     | T               |
| 16         | 31347748 | rs3925075  | 0.863108 | <i>ITGAX</i>    | -27.9664      | 4.17E-172      | G/A     | A               |
| 16         | 31347350 | rs4506917  | 0.863273 | <i>ITGAX</i>    | -27.9379      | 9.27E-172      | T/G     | T               |
| 16         | 31359826 | rs11645917 | 0.891087 | <i>ITGAX</i>    | -27.7002      | 6.94E-169      | T/C     | C               |
| 16         | 31334236 | rs11150610 | 0.800358 | <i>ITGAX</i>    | 23.83516      | 1.45E-125      | A/C     | A               |
| 16         | 31336719 | rs1143682  | 0.853171 | <i>ITGAX</i>    | 22.71235      | 3.39E-114      | G/A     | A               |
| 16         | 31363788 | rs11574630 | 0.892581 | <i>ITGAX</i>    | 22.27453      | 6.54E-110      | T/C     | T               |
| 16         | 31362263 | rs4889649  | 0.894909 | <i>ITGAX</i>    | 21.98276      | 4.23E-107      | T/G     | G               |
| 16         | 31363417 | rs10782004 | 0.891273 | <i>ITGAX</i>    | 21.73203      | 1.02E-104      | G/A     | A               |
| 16         | 31357760 | rs11150612 | 0.876378 | <i>ITGAX</i>    | 21.57095      | 3.38E-103      | G/A     | A               |
| 11         | 44091399 | rs7951555  | 0.891488 | <i>EXT2</i>     | 15.99954      | 1.29E-57       | A/G     | G               |
| 11         | 44093323 | rs2074040  | 0.867031 | <i>EXT2</i>     | 15.92642      | 4.16E-57       | C/G     | G               |
| 11         | 44087989 | rs2074038  | 1        | <i>EXT2</i>     | 15.36924      | 2.63E-53       | G/T     | T               |
| 11         | 44085687 | rs7127924  | 0.995501 | <i>EXT2</i>     | 13.40393      | 5.74E-41       | C/A     | A               |
| 11         | 44093323 | rs2074040  | 0.867031 | <i>EXT2</i>     | 10.41335      | 2.16E-25       | C/G     | G               |

|    |           |            |          |                         |          |          |     |   |
|----|-----------|------------|----------|-------------------------|----------|----------|-----|---|
| 11 | 44091399  | rs7951555  | 0.891488 | <i>EXT2</i>             | 10.37437 | 3.25E-25 | A/G | G |
| 11 | 44087989  | rs2074038  | 1        | <i>EXT2</i>             | 10.12433 | 4.31E-24 | G/T | T |
| 11 | 44085687  | rs7127924  | 0.995501 | <i>EXT2</i>             | 9.146848 | 5.86E-20 | C/A | A |
| 3  | 186732725 | rs3821819  | 0.949871 | <i>ST6GAL1</i>          | -9.14501 | 5.96E-20 | G/A | A |
| 16 | 31368178  | rs7190997  | 1        | <i>AC093520.4,ITGAM</i> | 10.24    | 1.36E-24 | C/T | C |
| 16 | 31368178  | rs7190997  | 1        | <i>BCKDK</i>            | 9.93     | 3.17E-23 | C/T | C |
| 3  | 186734466 | rs967367   | 0.950775 | <i>ST6GAL1</i>          | -9.13104 | 6.79E-20 | G/A | A |
| 3  | 186732679 | rs17776120 | 0.950398 | <i>ST6GAL1</i>          | -9.10268 | 8.82E-20 | C/A | A |

**Supplementary table 14:** Association between genotypes and mRNA expression levels in whole blood using an eQTL meta-analysis (data taken from Blood eQTL browser <http://genenetwork.nl/bloodeqtlbrowser/>; Westra et. al. 2013<sup>7</sup>)

**R2%** is the  $r^2$  value between the SNP and the reported risk SNP within the locus

**\*Candidate gene** is the gene whose expression is affected as determined in the whole blood based eQTL meta-analysis

**^ Meta z score** and **#Meta p value** is the combined z score and p value obtained in the eQTL meta-analysis when analyzing all the datasets together using data from Westra et al (2013). A positive z score (greater than 0) implies an increase in expression for the allele assessed, while a negative z score implies the allele assessed associates to a reduction in gene expression in comparison with the other allele.

| SNP_B      | CHR_B | BP_B      | R2       | Monocytes  |          |          |              | B-cells    |          |         |                |
|------------|-------|-----------|----------|------------|----------|----------|--------------|------------|----------|---------|----------------|
|            |       |           |          | p.spearman | P        | BETA     | Gene         | p.spearman | P        | BETA    | Gene           |
| rs2074040  | 11    | 44093323  | 0.867031 | 4.96E-24   | 1.07E-36 | 0.7947   | <i>ACCS</i>  | 2.33E-23   | 1.46E-29 | 0.638   | <i>ACCS</i>    |
| rs2074040  | 11    | 44093323  | 0.867031 | 2.45E-22   | 1.94E-35 | 0.7603   | <i>PHACS</i> | 8.06E-19   | 2.32E-22 | 0.5992  | <i>PHACS</i>   |
| rs7951555  | 11    | 44091399  | 0.891488 | 2.45E-22   | 1.94E-35 | 0.7603   | <i>PHACS</i> | 8.06E-19   | 2.32E-22 | 0.5992  | <i>PHACS</i>   |
| rs4075052  | 16    | 31348233  | 0.887373 | 1.94E-11   | 7.71E-14 | -0.1612  | <i>ITGAM</i> | -          | -        | -       | -              |
| rs4597342  | 16    | 31343769  | 0.872532 | 1.94E-11   | 7.71E-14 | -0.1612  | <i>ITGAM</i> | -          | -        | -       | -              |
| rs11150614 | 16    | 31366016  | 0.979853 | 3.64E-11   | 1.89E-12 | -0.1562  | <i>ITGAM</i> | -          | -        | -       | -              |
| rs7206295  | 16    | 31336519  | 0.832116 | 1.56E-10   | 1.01E-12 | -0.1547  | <i>ITGAM</i> | -          | -        | -       | -              |
| rs7206295  | 16    | 31336519  | 0.832116 | 2.31E-08   | 7.75E-09 | -0.1456  | <i>ITGAX</i> | -          | -        | -       | -              |
| rs8060268  | 16    | 31345280  | 0.881129 | 1.59E-10   | 1.07E-12 | -0.1546  | <i>ITGAM</i> | -          | -        | -       | -              |
| rs8060268  | 16    | 31345280  | 0.881129 | 9.24E-08   | 2.03E-08 | -0.1417  | <i>ITGAX</i> | -          | -        | -       | -              |
| rs7190997  | 16    | 31368178  | 1        | 3.01E-06   | 6.51E-07 | -0.1032  | <i>ITGAM</i> | -          | -        | -       | -              |
| rs3925075  | 16    | 31347748  | 0.863108 | 3.17E-06   | 2.44E-07 | -0.1067  | <i>ITGAM</i> | -          | -        | -       | -              |
| rs3925075  | 16    | 31347748  | 0.863108 | 5.11E-05   | 9.25E-05 | -0.09343 | <i>ITGAX</i> | -          | -        | -       | -              |
| rs2977798  | 8     | 6697450   | 0.999287 | 0.000165   | 0.000422 | 0.09989  | <i>DEFBI</i> | -          | -        | -       | -              |
| rs17776120 | 3     | 186732679 | 0.950398 | -          | -        | -        | -            | 3.6E-07    | 1.61E-07 | -0.2581 | <i>ST6GAL1</i> |

**Supplementary table 15:** Association between genotypes and mRNA expression levels in monocytes and B-cells using an eQTL analysis (data taken from Fairfax et. al. 2012)<sup>8</sup>

| Locus                      | SNP              | Risk allele | YRI         | CEU         | CHB+JPT     |
|----------------------------|------------------|-------------|-------------|-------------|-------------|
| Gharavi et al <sup>3</sup> |                  |             |             |             |             |
| <b>CFH</b>                 | <b>rs3766404</b> | <b>T</b>    | <b>0.45</b> | <b>0.85</b> | <b>0.92</b> |
| <b>CFH</b>                 | <b>rs6677604</b> | <b>G</b>    | <b>0.51</b> | <b>0.76</b> | <b>0.92</b> |
| <i>HLA</i>                 | rs2856717        | G           | 0.63        | 0.63        | 0.79        |
| <i>HLA</i>                 | rs9275596        | T           | 0.70        | 0.59        | 0.83        |
| <i>HLA</i>                 | rs9357155        | G           | 0.93        | 0.85        | 0.85        |
| <i>HLA</i>                 | rs2071543        | G           | 0.92        | 0.83        | 0.84        |
| <i>HLA</i>                 | rs3129269        | C           | 0.83        | 0.67        | 0.79        |
| <i>HLA</i>                 | rs1883414        | G           | 0.89        | 0.68        | 0.81        |
| <b>MTMR3/HORMAD2</b>       | <b>rs2412971</b> | <b>G</b>    | <b>0.22</b> | <b>0.57</b> | <b>0.65</b> |
| <b>MTMR3/HORMAD2</b>       | <b>rs2412973</b> | <b>C</b>    | <b>0.22</b> | <b>0.62</b> | <b>0.68</b> |
| Yu et al <sup>1</sup>      |                  |             |             |             |             |
| <i>DEFA</i>                | rs2738048        | T           | 0.82        | 0.71        | 0.64        |
| <i>TNFSF13</i>             | rs3803800        | A           | 0.78        | 0.22        | 0.30        |
| <i>TNFSF13</i>             | rs4227           | G           | 0.54        | 0.25        | 0.18        |
| <b>MTMR3/HORMAD2</b>       | <b>rs12537</b>   | <b>C</b>    | <b>0.53</b> | <b>0.69</b> | <b>0.80</b> |
| <i>HLA-A</i>               | rs2523946        | C           | 0.51        | 0.52        | 0.51        |
| <i>HLA-DRB1</i>            | rs660895         | G           | 0.10        | 0.28        | 0.25        |
| <i>HLA-DQA/B</i>           | rs1794275        | A           | 0.23        | 0.20        | 0.22        |
| This study                 |                  |             |             |             |             |
| <b>ITGAX/ITGAM</b>         | <b>rs7190997</b> | <b>C</b>    | <b>0.47</b> | <b>0.53</b> | <b>0.75</b> |
| <b>ACCS</b>                | <b>rs2074038</b> | <b>T</b>    | <b>0.00</b> | <b>0.12</b> | <b>0.33</b> |
| <i>ODFI/KLF10</i>          | rs2033562        | G           | 0.67        | 0.33        | 0.59        |
| <b>ST6GALI</b>             | <b>rs7634389</b> | <b>C</b>    | <b>0.16</b> | <b>0.38</b> | <b>0.40</b> |
| <b>DEFA</b>                | <b>rs2738058</b> | <b>T</b>    | <b>0.35</b> | <b>0.40</b> | <b>0.65</b> |
| <b>DEFA</b>                | <b>rs9314614</b> | <b>C</b>    | <b>0.19</b> | <b>0.41</b> | <b>0.43</b> |
| <i>DEFA</i>                | rs12716641       | T           | 0.76        | 0.58        | 0.79        |

**Supplementary table 16.** Risk allele frequencies of SNPs in previously reported and newly discovered loci for IgAN in HapMap Africans (YRI), Europeans (CEU) and Asians (CHB+JPT). Frequency information was extracted from HapMap Data Rel 28 Phase II+III and 1000 genomes pilot low coverage sequencing data. Loci showing a trend of increasing risk allele frequencies from Africans to Asians are highlighted in bold font (<http://hapmap.ncbi.nlm.nih.gov/>)

## **Supplementary Note.** Description of sample collections

### **GWAS cohorts**

The original genome-wide discovery dataset consisted of 1,523 cases recruited from The First Affiliated Hospital, Sun Yat-sen University.

### **Validation 1 cohorts**

This cohort consists of 2,096 individuals of Han Chinese ancestry (2,651 biopsy-diagnosed cases and 2,907 controls) recruited across China, including the clinical centers of Guangdong, Guangxi, Sichuan, Henan, Fujian, Hunan, Hubei, Jiangxi, Jiangsu and Yunnan. All cases had a histology-proven diagnosis of IgAN. Genomic DNA was isolated from whole blood using a commercial DNA extraction kit (Qiagen) and quantified using Picogreen reagent (Invitrogen).

- The Guangdong Validation 1 cohorts (1,008 cases and 2,907 controls) was recruited among self-reported Han Chinese individuals residing in the metropolitan areas of five major cities in Guangdong: Guangzhou (The First Affiliated Hospital of Sun Yat-sen University, Guangdong General Hospital, The Third Affiliated Hospital of Sun Yat-sen University, Zhujiang Hospital of Nanfang Medical University, Guangzhou General Hospital of Nanjing Military Command, Nanfang Hospital of Nanfang Medical University, The Second Affiliated Hospital of Sun Yat-sen University, Guangdong Provincial Traditional Chinese Medicine Hospital and The Affiliated Hospital of Guangdong Medical University), Foshan (The First People's Hospital of Foshan), Zhuhai (The Fifth Affiliated Hospital of Sun Yat-sen University), Zhongshan (The People's Hospital of Zhongshan), and Shenzhen (The First Affiliated Hospital of Shenzhen University).
- The Guangxi Validation 1 cohort (62 cases) was composed of self-reported Han Chinese individuals recruited in Nanning (The First Affiliated Hospital of Guangxi Medical University and The People's Hospital of Guangxi Zhuang Autonomous Region).
- The Sichuan Validation 1 cohort (119 cases) was composed of self-reported Han Chinese individuals recruited in Chengdu (West China Medical School, West China Hospital, Sichuan University).
- The Henan Validation 1 cohort (2 cases) was composed of self-reported Han Chinese individuals recruited in Zhengzhou (The First Affiliated Hospital of Zhengzhou University).
- The Fujian Validation 1 cohort (265 cases) was recruited among self-reported Han Chinese individuals residing in the metropolitan areas of two major cities in Fujian: Fuzhou (Fuzhou General Hospital of Nanjing Military Command and The First Affiliated Hospital of Fujian Medical University) and Xiamen (The First Affiliated Hospital of Shenzhen University).
- The Hunan Validation 1 cohort (2 cases) was composed of self-reported Han Chinese individuals recruited in Changsha (The Third Xiangya Hospital of Central South University).
- The Hubei Validation 1 cohort (59 cases) was composed of self-reported Han Chinese individuals recruited in Wuhan (Tongji Hospital, Tongji Medical College, Huazhong University of Science and Technology, Union Hospital, Tongji Medical College, Huazhong University of Science and Technology and Wuhan First Municipal People's Hospital).
- The Jiangxi Validation 1 cohort (14 cases) was composed of self-reported Han Chinese individuals recruited in Nanchang (The Jiangxi Provincial People's Hospital and The First Affiliated Hospital of Nanchang University).
- The Jiangsu Validation 1 cohort (249 cases) was composed of self-reported Han Chinese individuals recruited in Nanjing (Nanjing General Hospital of Nanjing Military Command).
- The Yunnan Validation 1 cohort (4 cases) was composed of self-reported Han Chinese

- individuals recruited in Kunming (YunNan Provincial People's Hospital).
- Unknown Validation 1 cohorts (867 cases)

## **Validation 2 cohorts**

This cohort consists of 6,630 individuals of Han Chinese ancestry (2,428 biopsy-diagnosed cases and 4,202 controls) recruited across China, including the clinical centers of Guangdong, Guangxi, Shanghai, Ningxia, Henan, Zhejiang, Sichuan, Jiangxi, Jiangsu, Fujian, Hubei, Shanxi and Beijing. All cases had a histology-proven diagnosis of IgAN. Genomic DNA was isolated from whole blood using a commercial DNA extraction kit (Qiagen) and quantified using Picogreen reagent (Invitrogen).

- The Guangdong Validation 2 cohort (300 cases and 1,800 controls) was recruited among self-reported Han Chinese individuals residing in the metropolitan areas of three major cities in Guangdong: Guangzhou (The First Affiliated Hospital of Sun Yat-sen University, Guangdong General Hospital, ZhuJiang Hospital of Nanfang Medical University, The First Affiliated Hospital of Jinan University and Guangdong General Hospital), Foshan (The First People's Hospital of Foshan), and Shenzhen (The First Affiliated Hospital of ShenZhen University).
- The Guangxi Validation 2 cohort (114 cases) was composed of self-reported Han Chinese individuals recruited in Nanning (The First Affiliated Hospital of Guangxi Medical University and The People's Hospital of Guangxi Zhuang Autonomous Region).
- The Shanghai Validation 2 cohort (326 cases) was composed of self-reported Han Chinese individuals recruited in Shanghai (RuiJin Hospital Affiliated To Shanghai Jiao Tong University School of Medicine and Shanghai Changzheng hospital, Affiliated To The Second Military Medical University).
- The Ningxia Validation 2 cohort (193 cases) was composed of self-reported Han Chinese individuals recruited in Yinchuan (General Hospital of Ningxia Medicine University).
- The Henan Validation 2 cohort (42 cases) was composed of self-reported Han Chinese individuals recruited in Zhengzhou (The First Affiliated Hospital of Zhengzhou University).
- The Zhejiang Validation 2 cohort (25 cases) was composed of self-reported Han Chinese individuals recruited in Hangzhou (The First Affiliated Hospital of College of Medicine, Zhejiang University).
- The Sichuan Validation 2 cohort (11 cases) was composed of self-reported Han Chinese individuals recruited in Chengdu (West China Medical School, West China Hospital, Sichuan University).
- The Jiangxi Validation 2 cohort (28 cases) was composed of self-reported Han Chinese individuals recruited in Nanchang (The First Affiliated Hospital of Nanchang University).
- The Jiangsu Validation 2 cohort (15 cases) was composed of self-reported Han Chinese individuals recruited in Nanjing (Nanjing General Hospital of Nanjing Military Command).
- The Fujian Validation 2 cohort (40 cases and 252 controls) was recruited among self-reported Han Chinese individuals residing in Fuzhou (Fuzhou General Hospital of Nanjing Military Command and The First Affiliated Hospital of Fujian Medical University).
- The Hubei Validation 2 cohort (64 cases) was composed of self-reported Han Chinese individuals recruited in Wuhan (Tongji Hospital, Tongji Medical College, Huazhong University of Science and Technology, Union Hospital, Tongji Medical College, Huazhong University of Science and Technology).
- The Shanxi Validation 2 cohort (350 controls) was composed of self-reported Han Chinese individuals recruited in Taiyuan (the Second Affiliated Hospital of Shanxi Medical University).
- The Beijing Validation 2 cohort (1,270 cases and 1,800 controls) was composed of self-reported Han Chinese individuals recruited in Beijing (Peking University First Hospital).

### Validation 3 cohorts

This cohort consists of 1,800 individuals of Han Chinese ancestry (1800 biopsy-diagnosed cases and 1,910 age/gender/region matched controls) recruited across China, including the clinical centers of Guangdong, Guangxi, Shanghai, Hebei, Sichuan, Jiangxi, Shaanxi, Fujian, Hunan, Hubei, Ningxia, Shanxi, Shandong, Yunnan, Heilongjiang, Henan, Gansu, Liaoning, Hainan and Beijing. All cases had a histology-proven diagnosis of IgAN. Genomic DNA was isolated from whole blood using a commercial DNA extraction kit (Qiagen) and quantified using Picogreen reagent (Invitrogen).

- The Guangdong Validation 3 cohort (380 cases and 1,910 controls) was recruited among self-reported Han Chinese individuals residing in the metropolitan areas of three major cities in Guangdong: Guangzhou (The First Affiliated Hospital of Sun Yat-sen University, The Third Affiliated Hospital of Sun Yat-sen University, ZhuJiang Hospital of Nanfang Medical University, Guangdong General Hospital), Foshan (The First People's Hospital of Foshan), Huizhou(Huizhou Municipal Central Hospital), and Jiangmen (JiangMen Municipal Central Hospital).
- The Guangxi Validation 3 cohort (18 cases) was composed of self-reported Han Chinese individuals recruited in Nanning (The First Affiliated Hospital of Guangxi Medical University and The People's Hospital of Guangxi Zhuang Autonomous Region).
- The Shanghai Validation 3 cohort (195 cases) was composed of self-reported Han Chinese individuals recruited in Shanghai (RuiJin Hospital Affiliated To Shanghai Jiao Tong University School of Medicine, XinHua Hospital Affiliated To Shanghai Jiao Tong University School of Medicine, The Sixth People's Hospital of ShanHai, and ShangHai HuaShan hospital Affiliated To FuDan University).
- The Ningxia Validation 3 cohort (26 cases) was composed of self-reported Han Chinese individuals recruited in Yinchuan (General Hospital Of NingXia Medicine University).
- The Hebei Validation 3 cohort (13 cases) was composed of self-reported Han Chinese individuals recruited in Shijiazhuang (The Third Hospital of Hebei Medical University, HeBei Provincial People's Hospital Hospital).
- The Sichuan Validation 3 cohort (474 cases) was composed of self-reported Han Chinese individuals recruited in Chengdu (Sichuan Provincial People's Hospital). ChongQing (The First Affiliated Hospital of ChongQing Medical University, Xinqiao hospital Affiliated To Third Military Medical University).
- The Jiangxi Validation 3 cohort (33 cases) was composed of self-reported Han Chinese individuals recruited in Nanchang (The First Affiliated Hospital of Nanchang University and The Second Affiliated Hospital of Nanchang University).
- The Shaanxi Validation 3 cohort (10 cases) was composed of self-reported Han Chinese individuals recruited in Xian (XiJing Hospital, Affiliated To The Fourth Military Medical University).
- The Fujian Validation 3 cohort (15 cases) was recruited among self-reported Han Chinese individuals residing in Fuzhou (Fuzhou General Hospital of Nanjing Military Command and The First Affiliated Hospital of Fujian Medical University).
- The Hubei Validation 3 cohort (3 cases) was composed of self-reported Han Chinese individuals recruited in Wuhan (Tongji Hospital, Tongji Medical College, Huazhong University of Science and Technology, and ZhongNan Hospital of WuHan University).
- The Hunan Validation 3 cohort (32 cases) was composed of self-reported Han Chinese individuals recruited in Wuhan (The Second Xiangya Hospital of Central South University and The Third Xiangya Hospital of Central South University).
- The Shanxi Validation 3 cohort (4 cases) was composed of self-reported Han Chinese individuals recruited in Taiyuan (ShanXi Provincial People's Hospital).

- The Beijing Validation 3 cohort (511 cases) was composed of self-reported Han Chinese individuals recruited in Beijing (Peking University First Hospital, Beijing Anzhen Hospital Affiliated To Capital Medical University, Beijing XuanWu hospital Affiliated To Capital Medical University).
- The Shandong Validation 3 cohort (15 cases) was composed of self-reported Han Chinese individuals recruited in Jinan (Shandong Provincial Hospital) and Qingdao(The Affiliated Hospital of QingDao University).
- The Hainan Validation 3 cohort (2 cases) was composed of self-reported Han Chinese individuals recruited in HaiKou (The People’s Hospital of HaiKou).
- The Liaoning Validation 3 cohort (23 cases) was composed of self-reported Han Chinese individuals recruited in Dalian(The First Affiliated Hospital of DaLian Medical University) and Shenyang(The First Affiliated Hospital of China Medical University).
- The Gansu Validation 3 cohort (7 cases) was composed of self-reported Han Chinese individuals recruited in Lanzhou (LanZhou General Hospital of LanZhou Military Commond, The Second Affiliated Hospital of LanZhou University).
- The Henan Validation 3 cohort (15 cases) was composed of self-reported Han Chinese individuals recruited in Zhengzhou (The First Affiliated Hospital of Zhengzhou University).
- The Heilongjiang Validation 3 cohort (2 cases) was composed of self-reported Han Chinese individuals recruited in HarBin (The Second Affiliated Hospital of HarBin Medical University).
- The Yunnan Validation 3 cohort (22 cases) was composed of self-reported Han Chinese individuals recruited in Kunming (First People’s Hospital of Yunnan Province).

### **Classification of Northern and Southern Chinese subjects**

The definition of northern and southern was done in the same way as our previous GWAS study<sup>2</sup>. Briefly, subjects originating from (Hai Nan, Guang Dong, Guang Xi, Fu Jian, Yu Nan, Gui Zhou, Hu Nan, Hubei, Si Chuan, Jiang Xi, Jiang Shu, Zhe Jiang, Shang Hai, An Hui and Chong Qing provinces) of China were classified as southern Chinese and the remaining subjects were classified as northern Chinese.

### **Grading of samples by the Oxford classification<sup>17,18</sup>**

A total of 2,776 IgAN patients from our centre (1,248 from the discovery samples and 1,528 from the validation samples) had full pathological information graded by the Oxford classification. The number and percentage of samples graded by Oxford classification are as shown below:

| <b>Number and percentage of samples graded by Oxford classification</b> |                |                |              |
|-------------------------------------------------------------------------|----------------|----------------|--------------|
| M: n=2024                                                               | MO:821(40.6%)  | M1:1203(59.4%) |              |
| E: n=1892                                                               | E0:1559(82.4%) | E1:333(17.6%)  |              |
| S: n=2035                                                               | S0:1043(51.3%) | S1: 992(48.7%) |              |
| T: n=1949                                                               | T0:1301(66.8%) | T1:494(25.3%)  | T2:154(7.9%) |



## Supplementary references

1. Zhou, X. & Stephens, M. Genome-wide efficient mixed-model analysis for association studies. *Nat Genet* 44, 821-4 (2012).
2. Yu, X.Q. et al. A genome-wide association study in Han Chinese identifies multiple susceptibility loci for IgA nephropathy. *Nat Genet* 44, 178-82 (2012).
3. Purcell, S., Cherny, S.S. & Sham, P.C. Genetic Power Calculator: design of linkage and association genetic mapping studies of complex traits. *Bioinformatics* 19, 149-50 (2003).
4. Gharavi, A.G. et al. Genome-wide association study identifies susceptibility loci for IgA nephropathy. *Nat Genet* 43, 321-7 (2011).
5. Kiryluk, K. et al. Discovery of new risk loci for IgA nephropathy implicates genes involved in immunity against intestinal pathogens. *Nat Genet* (2014).
6. Jia, X. et al. Imputing amino acid polymorphisms in human leukocyte antigens. *PLoS One* 8, e64683 (2013).
7. Westra, H.J. et al. Systematic identification of transeQTLs as putative drivers of known disease associations. *Nat Genet* 45, 1238-43 (2013).
8. Fairfax, B.P. et al. Genetics of gene expression in primary immune cells identifies cell type-specific master regulators and roles of HLA alleles. *Nat Genet* 44, 502-10 (2012).
9. Boyle, A.P., et al. Annotation of functional variation in personal genomes using RegulomeDB. *Genome Research* 22, 1790-1797 (2012)
10. Ward, L.D. & Kellis, M. HaploReg: a resource for exploring chromatin states, conservation, and regulatory motif alterations within sets of genetically linked variants. *Nucleic Acids Res* 40, D930-4 (2012).
11. Welter, D. et al. The NHGRI GWAS Catalog, a curated resource of SNP-trait associations. *Nucleic Acids Research* 42 (Database issue), D1001-D1006 (2014)
12. Kunisawa, J. et al. Microbe-dependent CD11b<sup>+</sup> IgA<sup>+</sup> plasma cells mediate robust early-phase intestinal IgA responses in mice. *Nat. Commun.* 4, 1772 (2013).
13. Hom, G. et al. Association of systemic lupus erythematosus with C8orf13-BLK and ITGAM-ITGAX. *N Engl J Med* 358,900-9 (2008)
14. Harley, J.B. et al. Genome-wide association scan in women with systemic lupus erythematosus identifies susceptibility variants in ITGAM, PXX, KIAA1542 and other loci. *Nat Genet*40, 204-10 (2008)
15. Zhou, X.J. et al. Association of systemic lupus erythematosus susceptibility genes with IgA nephropathy in a Chinese cohort. *Clin J Am Soc Nephrol* 9, 788-97 (2014).
16. Corrado, A., Quarta, L., Di Palma, A.M., Gesualdo, L. & Cantatore, F.P. IgA nephropathy in systemic lupus erythematosus. *Clin Exp Rheumatol* 25, 467-9 (2007).
17. Cattran D.C. et al. The Oxford classification of IgA nephropathy: rationale, clinicopathological correlations, and classification. *Kidney Int* 76, 534-45. (2009)
18. Roberts I.S. et al. The Oxford classification of IgA nephropathy: pathology definitions, correlations, and reproducibility. *Kidney Int* 76, 546-56. (2009)
